1 **Cellular electrical impedance to profile SARS-CoV-2 fusion**  
2 **inhibitors and to assess the fusogenic potential of spike**  
3 **mutants**

4 Emiel Vanhulle,<sup>a#</sup> Jordi Doijen,<sup>a##</sup> Joren Stroobants,<sup>a</sup> Becky Provinciael,<sup>a</sup> Sam  
5 Noppen,<sup>a</sup> Dominique Schols,<sup>a</sup> Annelies Stevaert,<sup>a</sup> Kurt Vermeire<sup>a§</sup>

6 <sup>a</sup>KU Leuven, Department of Microbiology, Immunology and Transplantation, Rega  
7 Institute, Laboratory of Virology and Chemotherapy, Herestraat 49, 3000 Leuven,  
8 Belgium

9 \*Present address: Janssen Global Public Health, Janssen Pharmaceutica, Beerse,  
10 Belgium

11 # Both authors contributed equally to this work

12 § Corresponding author

13 E-mail: [kurt.vermeire@kuleuven.be](mailto:kurt.vermeire@kuleuven.be)

14 ORCID: Kurt Vermeire: 0000-0003-1123-1907

15 ORCID: Emiel Vanhulle: 0000-0002-5483-6925

16 ORCID: Jordi Doijen: 0000-0002-1707-0174

17 ORCID: Annelies Stevaert: 0000-0003-3316-2826

18

19 Running Title: SARS-CoV-2 fusion with cellular electrical impedance

## 20 **Abstract**

21 Despite the vaccination campaigns for COVID-19, we still cannot control the spread of  
22 SARS-CoV-2, as evidenced by the ongoing circulation of the Omicron variants of  
23 concern. This highlights the need for broad-spectrum antivirals to further combat  
24 COVID-19 and to be prepared for a new pandemic with a (re-)emerging coronavirus.  
25 An interesting target for antiviral drug development is the fusion of the viral envelope  
26 with host cell membranes, a crucial early step in the replication cycle of enveloped  
27 viruses. In this study, we explored the use of cellular electrical impedance (CEI) to  
28 quantitatively monitor morphological changes in real time, resulting from cell-cell fusion  
29 elicited by SARS-CoV-2 spike. The impedance signal in CEI-quantified cell-cell fusion  
30 correlated with the expression level of SARS-CoV-2 spike in transfected HEK293T  
31 cells. For antiviral assessment, we validated the CEI assay with the fusion inhibitor  
32 EK1 and measured a concentration-dependent inhibition of SARS-CoV-2 spike  
33 mediated cell-cell fusion ( $IC_{50}$  value of 0.13  $\mu$ M). In addition, CEI was used to confirm  
34 the fusion inhibitory activity of the carbohydrate-binding plant lectin UDA against  
35 SARS-CoV-2 ( $IC_{50}$  value of 0.55  $\mu$ M), which complements prior in-house profiling  
36 activities. Finally, we explored the utility of CEI in quantifying the fusogenic potential of  
37 mutant spike proteins and in comparing the fusion efficiency of SARS-CoV-2 variants  
38 of concern. In summary, we demonstrate that CEI is a powerful and sensitive  
39 technology that can be applied to studying the fusion process of SARS-CoV-2 and to  
40 screening and characterizing fusion inhibitors in a label-free and non-invasive manner.

## 41 **Importance**

42 Despite the success of the vaccines against SARS-CoV-2, new variants of the virus  
43 are still emerging and spreading, underlining the need for additional effective antiviral

44 countermeasures. An interesting antiviral target for enveloped viruses is the fusion of  
45 the viral envelope with host cell membranes, a crucial early step in the life cycle of  
46 coronaviruses like SARS-CoV-2. Here, we present a sensitive impedance-based  
47 method to monitor in real-time cell-cell fusion elicited by the SARS-CoV-2 spike protein.  
48 With this technique we can profile entry inhibitors and determine the inhibitory potential  
49 of fusion inhibitors for SARS-CoV-2. In addition, with cellular electrical impedance we  
50 can evaluate the fusogenic properties of new emerging SARS-CoV-2 variants. Overall,  
51 the impedance technology adds valuable information on the fusion process of  
52 circulating coronaviruses and helps unravel the mode of action of new antivirals,  
53 opening new avenues for the development of next generation fusion inhibitors with  
54 improved antiviral activity.

## 55 **Keywords**

56 Cellular electrical impedance; SARS-CoV-2; cell-cell fusion; spike; entry inhibitor

## 57 **Abbreviations**

58 ACE2, angiotensin-converting enzyme 2; CEI, cellular electrical impedance; CI, cell  
59 index; COVID-19, coronavirus disease 2019; CTS, cathepsin; FP, fusion peptide; MFI,  
60 mean fluorescence intensity; RBD, receptor-binding domain; SARS-CoV-2, severe  
61 acute respiratory syndrome coronavirus 2; S, spike; TMPRSS2, transmembrane serine  
62 protease 2

## 63 Introduction

64 Despite the successful COVID-19 vaccination campaign, we are still unable to control  
65 the spread of new variants and/or prevent re-infections. This underlines the need to  
66 continue with the development of effective antiviral compounds against SARS-CoV-2.  
67 An appealing target for drug development is the fusion of SARS-CoV-2 viral envelope  
68 with host cell membranes, an essential early step in the coronavirus life cycle.

69 Entry of SARS-CoV-2 in target cells involves several sequential steps that are  
70 mediated by the spike (S) protein that drives the fusion process by a series of  
71 coordinated conformational changes (1-4). The S protein is cleaved into two subunits:  
72 the S1 subunit, which recognizes the angiotensin-converting enzyme 2 (ACE2) through  
73 binding via its receptor-binding domain (RBD) (5, 6), and the S2 subunit, which harbors  
74 the fusion machinery. Generally, these two subunits are post-translationally cleaved at  
75 the S1-S2 site of the S protein by the host serine protease furin (7, 8), however, it is  
76 still debatable if the Omicron S protein is less cleavable by furin (9-11). After binding  
77 to human ACE2, a transmembrane receptor that is highly expressed in lung epithelial  
78 cells, a second cleavage event at the S2' site must take place to render the S protein  
79 fully fusion-competent. For the initial SARS-CoV-2 variants (e.g., the Wuhan-Hu-1  
80 strain), S2' cleavage occurs preferably at the cell surface by type II transmembrane  
81 serine proteases (TTSPs) such as transmembrane protease serine 2 (TMPRSS2) (12,  
82 13). Alternative to the furin/TMPRSS2 proteolytic activation, SARS-CoV-2 can enter  
83 via endocytosis with cathepsin B or L (CTSB/L) cleaving the S protein (9), an entry  
84 route proposed for the recent Omicron variants (9, 10). Either way, receptor binding  
85 and S2' cleavage result in the formation of an elongated intermediate spike protein with  
86 its hydrophobic fusion peptide (FP) exposed, followed by the insertion of the activated  
87 fusion protein into the target host membrane (**Figure 1A**) (14). The subsequent

88 collapse of the metastable spike intermediate into an energetically stable (low energy)  
89 hairpin-like configuration, the so-called 6-helix bundle complex of the S2 trimer, brings  
90 the viral and cellular membrane in close proximity for their merger and the completion  
91 of membrane fusion. Finally, the viral genome is released into the cytosol of the host  
92 cell to initiate the replication cycle.

93 Cellular electrical impedance (CEI) is a label-free, quantitative analytical method used  
94 to study cell morphological changes in real time. When an electrical circuit is applied  
95 to a cell monolayer grown in microtiter plates embedded with gold electrodes (15, 16),  
96 the continuous sweeping of non-invasive alternating current (AC) voltages over a  
97 predefined set of frequencies allows us to measure the impedance ( $Z$ ) on this current.  
98 Cell Index (CI) is a quantitative measure of the status of the cells in an electrode-  
99 containing well and is based on the measured cell-electrode impedance (17). When  
100 cells are attached to and spread out over the electrodes, they act as insulating particles  
101 that will resist or impede the flow of the current. As a result, the impedance of the  
102 system (and its CI value) will increase when the cell monolayer becomes more  
103 confluent. On the other hand, when cells of a confluent cell culture die and lyse, the  
104 disruption of the cell monolayer facilitates current flow, which translates in a decrease  
105 in impedance over time. CEI has gained popularity in recent years as a method to  
106 monitor dynamic responses of cells. Among other areas of research, CEI has proven  
107 effective for cytotoxicity measurements and signalling pathway studies (18, 19), and is  
108 recently gaining popularity for virological studies as well (20, 21). For instance, CEI has  
109 been proposed as a generic screening method for fusion inhibitors targeting respiratory  
110 syncytial virus (RSV), dengue virus (DENV) and vesicular stomatitis virus (VSV), which  
111 are representatives of three viral fusion classes within the enveloped viruses (22).

112 Since the fusion of viral and cellular membranes induces changes in cell morphology,  
113 we explored the feasibility of CEI to monitor the fusion process of SARS-CoV-2 in real  
114 time in a cell-to-cell fusion format. In this work we (i) successfully optimized and  
115 validated an impedance-based fusion assay to quantifiable measure SARS-CoV-2  
116 spike-induced cell-cell fusion, (ii) evaluated potential SARS-CoV-2 fusion inhibitors,  
117 and, (iii) compared the fusogenic potential of SARS-CoV-2 variants of concern (VOCs).

## 118 **Results**

### 119 **SARS-CoV-2 spike-induced cell-cell fusion**

120 In previous studies (23, 24), we demonstrated that SARS-CoV-2 viral entry can be  
121 mimicked by a cell-cell fusion system in which acceptor cells express the cellular  
122 human ACE2 receptor and donor cells the complementary viral spike protein. In our  
123 current work, the lung epithelial cell line A549 (stably transduced with human ACE2 to  
124 elevate the endogenous receptor level) was chosen as acceptor cell, whereas spike-  
125 transfected HEK293T cells were selected as donor cells because of the high plasmid  
126 transfection efficiency of the latter. Co-cultivation of both cell types results in fusion of  
127 the cells with the generation of multinucleated giant cells, the so-called syncytia that  
128 can be microscopically observed.

129 To better visualize this cell-cell fusion event, we previously designed and reported a  
130 split neon green assay (**Figure 1B**) (23). Real time microscopy can be used to monitor  
131 the fusion event (see also **Supplementary movie 1**) and to evaluate the inhibitory  
132 effect of a fusion inhibitor (**Figure 1C**). However, as the read-out of this assay is the  
133 fluorescence of the neongreen protein, a certain delay has to be taken into account  
134 between the initial cell-cell membrane fusion and the ultimate formation of an active  
135 fluorescent protein, which largely depends on the intermingling of the cytosolic content  
136 of both cells and the migration and assembly of both neongreen subunits (**Figure 1C**;  
137 compare 3h with 12h condition for untreated spike-transfected cells). Furthermore,  
138 when a single spike-transfected cell fuses with multiple ACE2-expressing cells (or vice  
139 versa), the fluorescent signal might not accurately reflect the number of fusion events  
140 because of a possible imbalance in the amount of the two neongreen subunits in the  
141 cytosol of the multinucleated cell. Therefore, an alternative fusion assay based on  
142 cellular electrical impedance (CEI) was explored.

## 143 **Cellular electrical impedance as a measure for SARS-CoV-2 spike-** 144 **induced cell-cell fusion**

145 In order to measure CEI, experiments are performed in specialized impedance E-  
146 plates, i.e., microtiter plates with embedded golden microelectrodes. A549.ACE2<sup>+</sup> cells  
147 are first seeded into E-plates to obtain a confluent cell monolayer. When monitoring  
148 the impedance signal of this growing monolayer, a slow but steady increase in the cell  
149 index (CI) was observed during the initial adherence phase (**Figure 2**, grey line). At  
150 24h post plating, the A549.ACE2<sup>+</sup> cells are overlaid with HEK293T cells either  
151 transfected with empty vector (mock) or with a vector encoding the SARS-CoV-2 spike  
152 protein (**Figure 2**; phase #1). Cell-cell fusion is then triggered by the interaction of the  
153 viral fusion glycoproteins at the HEK293T cell surface with ACE2 receptor molecules  
154 on a neighbouring A549.ACE2<sup>+</sup> cell. The CI value of the A549.ACE2<sup>+</sup> cells exposed to  
155 mock-transfected control HEK293T cells slowly increases (because of residual cell  
156 proliferation and/or maturation of the cell layer, *i.e.*, more compact cell-to-cell contacts)  
157 until a nearly steady state is reached (**Figure 2**, grey line). However, when spike-  
158 transfected HEK293T cells are added on top of the A549.ACE2<sup>+</sup> cells, fusion already  
159 manifests within a few hours of cell overlay and the CI value sharply increases as a  
160 result of the generated syncytia (**Figure 2**, blue line). When cells fuse, the electrical  
161 current can no longer pass in between them because of a decrease in cell-cell borders  
162 and tight junctions in the cell monolayer. This CI increase correlates nicely with the  
163 formation of syncytia as determined by microscopy (see **Supplementary movie 2**).  
164 Once a maximum in cell-cell fusion is reached (**Figure 2**, blue line; phase #2), the CI  
165 value starts to decline because of the instability of the multinucleated cell membrane,  
166 and the subsequent cell lysis and destruction of the cell monolayer. At 24h post



167 overlay, the cell monolayer is completely destroyed and the CI has returned to baseline  
168 level (**Figure 2**, blue line; phase #3).

### 169 **Optimization of CEI for SARS-CoV-2 spike induced cell-cell fusion**

170 In a first set of optimization experiments, different parameters of our CEI assay were  
171 investigated to reach optimal fusion and to obtain higher CI values. As shown in **Figure**  
172 **3A**, the kinetics of cell-cell fusion depended on the ratio of acceptor:donor cells.  
173 Generally, an excess of spike-transfected donor cells enhanced the fusion process. An  
174 acceptor:donor cell ratio of 1:1 resulted in a nice response and was selected for further  
175 experiments (**Figure 3A**, blue curve). As expected, cell-cell fusion and the related  
176 impedance response relied on the complementary expression of ACE2 and S. This  
177 was evidenced by the absence of fusion either when A549.ACE2<sup>+</sup> cells were combined  
178 with mock-transfected HEK293T cells, or when native A549 control cells (with low  
179 endogenous ACE2 levels) were combined with S-expressing HEK293T cells  
180 (**Supplementary Figure 1A**). Furthermore, trypsinization of the transfected HEK293T  
181 cells (as compared to collection of the cells by simply resuspending the easy detaching  
182 cell monolayer) had a positive outcome on cell-cell fusion, with a faster and more  
183 uniformly response (**Supplementary Figure 1B**). Lowering the incubation  
184 temperature of the HEK293T cells from 37 to 34°C during the spike biogenesis after  
185 transfection did not impact the initial phase of fusion but appears to somewhat reduce  
186 the maximum response (**Supplementary Figure 1C**). Importantly, the expression level  
187 of spike on the HEK293T cells was a crucial determinant for CI signal. Cell surface  
188 levels of spike not only affected the amplitude of CI but also the kinetics of cell-cell  
189 fusion in a concentration dependent manner (**Figure 3B** and **Supplementary Figure**  
190 **1D**). Although TMPRSS2 has been reported to be an important cellular protease for  
191 the activation of S (5, 12, 13), in the context of a cell-cell fusion assay transfection of

192 the A549.ACE2<sup>+</sup> cells for additional exogenous expression of TMPRSS2 was not a  
193 prerequisite to obtain fusion, as also seen by others (25). However, enhanced  
194 expression of TMPRSS2 seemed to accelerate and amplify the fusion response  
195 (**Figure 3C**).

## 196 **Validation of CEI as a quantifiable method of SARS-CoV-2 spike-** 197 **induced cell-cell fusion**

198 We next explored if our CEI-based fusion assay could be implemented for the  
199 evaluation of fusion inhibitors and the profiling of entry inhibitors for SARS-CoV-2. First,  
200 we examined the reported SARS-CoV-2 fusion inhibitor EK1 (26-28), a peptide that  
201 mimics the Heptad Repeat domain 2 (HR2) of the viral S protein and interferes with  
202 the formation of the 6-helix bundle hairpin complex during fusion (**Figure 1A**).  
203 Administration of EK1 inhibited cell-cell fusion, with a nearly complete protection at 10  
204  $\mu\text{M}$  concentration (92% reduction in max CI; **Figure 4A**), and in a concentration-  
205 dependent manner ( $\text{IC}_{50}$  value of 0.13  $\mu\text{M}$ ; **Supplementary Figure 2A**), thus,  
206 validating our CEI-based fusion assay for the analysis of fusion inhibitors. In contrast,  
207 the inhibitory effect of a S-neutralizing antibody (Ab) that binds to the RBD of S (Ab  
208 R001) was rather limited and depended strongly on the intrinsic efficiency and kinetics  
209 of the experimental cell-cell fusion (**Figure 4B** and **Supplementary Figure 2B**). Even  
210 a saturating Ab concentration of 10  $\mu\text{g}/\text{ml}$ , that completely prevents virus entry of  
211 authentic SARS-CoV-2 virus in Vero E6 and Calu-3 cells, as shown earlier (29, 30),  
212 reduced the fusion response by only 45% (**Figure 4B**). Furthermore, when Ab R001  
213 was tested in an additional experiment in which cell-cell fusion occurred more efficiently  
214 and rapidly because of exogenous TMPRSS2 (as evidenced by the CI response), no  
215 reduction in maximum impedance response could be recorded and only a delay in the  
216 fusion kinetics was observed (**Supplementary Figure 2B**). Also, when a peptide that

217 represents the RBD of S was tested in our fusion assay, a comparable shift in the CI  
218 peak was observed, presumably because of a competition between soluble RBD and  
219 cellular-expressed S for the interaction with ACE2 (**Supplementary Figure 2C**; red  
220 curve). These data suggest that attachment inhibitors are less potent in the prevention  
221 of the fusion event, and indicate that a CEI-based fusion assay might distinguish  
222 between fusion inhibitors and attachment inhibitors. Of note, in the absence of S  
223 expressing HEK293T cells, CEI detected some cell morphological changes in the  
224 A549.ACE2<sup>+</sup> monolayer because of RBD binding to the ACE2 receptor  
225 (**Supplementary Figure 2C**; green curve).

226 In a previous study, we investigated the antiviral potential of the plant lectin UDA  
227 against SARS-CoV-2 and reported a profound inhibitory effect of UDA on virus entry  
228 (23). Evaluation of UDA in our CEI assay clearly demonstrated deceleration and  
229 inhibition of S-induced fusion in a concentration-dependent way (**Figure 4C**), with an  
230 IC<sub>50</sub> value of 0.55 μM, that correlates well with its reported antiviral potency against  
231 authentic SARS-CoV-2 *in vitro* (23). In line with that report (23), UDA pretreatment of  
232 the ACE2<sup>+</sup> acceptor cells (followed by compound wash-out) had little impact on cell-  
233 cell fusion whereas pre-incubation of the S-expressing cells with UDA (followed by  
234 compound wash-out) profoundly protected the fusion event (**Supplementary Figure**  
235 **3**), confirming our observation that UDA binds to the glycosylated viral S protein rather  
236 than the cellular receptor.

### 237 **CEI to analyze the fusogenic potential of SARS-CoV-2 spike variants**

238 One of the advantages of our CEI assay is the flexibility and easy-to-adapt format of  
239 the protocol. For example, mutants of SARS-CoV-2 spike can be easily designed and  
240 used for the transfection of the HEK293T cells. Hence, with CEI spikes from different  
241 SARS-CoV-2 VOCs can be compared for their fusogenic potential. As shown in **Figure**

242 **5A**, spikes carrying the D614G mutation, as present in all variants since early 2020  
243 (Nextstrain clade 20A and its descendants), retained a similar fusogenic efficiency as  
244 compared to the original Wuhan-Hu-1 strain S. In contrast, the Omicron VOC  
245 circulating in 2022 has been reported to possess a reduced fusogenic potential (9, 10,  
246 31). Interestingly, our CEI assay also confirmed the reduced fusion of Omicron S (BA.1  
247 variant) as compared to Wuhan-Hu-1 S (**Figure 5B**), as evidenced by a slower and  
248 attenuated impedance response. This reduced fusogenic potential of Omicron was  
249 also observed when an excess of spike-expressing plasmid was used for the  
250 transfection of the HEK293T cells (**Supplementary Figure 4A**). In fact, the reduced  
251 fusion potential of Omicron as compared to Wuhan-Hu-1 could not directly be linked to  
252 attenuated spike expression, as evidenced by the comparable levels of S protein that  
253 could be detected by flow cytometry on the surface of HEK293T cells transfected with  
254 similar amounts (2.5  $\mu$ g) of plasmid (**Supplementary Figure 4B**).

255 Finally, we used CEI to analyze different SARS-CoV-2 spike glycosylation deletions to  
256 complement previous work on the plant lectin UDA (23). As shown in **Figure 5C**, a  
257 fusion assay with 3 different double-glycosylation mutants confirmed the preserved  
258 activity of UDA against spike variants with depleted glycans in the S2 unit, indicating  
259 that removal of N-glycosylation sites in the S2 subunit will not result in SARS-CoV-2  
260 escape mutants for UDA. Of note, the difference in the CI amplitude that was observed  
261 between the untreated S-transfected control samples of the different N-glycosylation  
262 mutants (**Supplementary Figure 4C**) was simply related to different levels of S  
263 expression on the HEK293T cells, as verified by flow cytometry (**Supplementary**  
264 **Figure 4D**), presumably because N-glycosylation depletion affected S protein stability  
265 and subsequent cell surface expression.

## 266 Discussion

267 In this study, we have implemented cell-based electrical impedance to measure SARS-  
268 CoV-2 spike-induced cell-cell fusion in real time and have demonstrated that CEI can  
269 be used to characterize fusion inhibitors for SARS-CoV-2. In addition, we have shown  
270 its feasibility to analyze the fusogenic properties of spike proteins from different  
271 circulating SARS-CoV-2 VOCs. The technique measures the kinetics of the fusion  
272 process in real-time, in a label-free and in a non-invasive format, allowing further down-  
273 stream analysis of the samples (e.g., qPCR or Western blot analysis). Although CEI  
274 does not require expensive detection reagents or artificial detection systems (32),  
275 specialized microtiter plates embedded with gold electrodes are needed for the  
276 experimental set-up, which may affect the cost of this alternative fusion assay. A big  
277 advantage of CEI as compared with other cell-cell fusion detection methods for SARS-  
278 CoV-2 (e.g., split neogreen; **Figure 1B**) is the real-time quantification of membrane  
279 fusion, which does not depend on the intermingling of the cytosolic content of the fused  
280 cells and the formation of an active fluorescent protein or translation of a reporter  
281 enzyme (e.g., luciferase (25)). Generally, S induced cell-cell fusion already manifests  
282 within the first hours of cell overlay (**Figure 1C**; syncytia visible at 3h), but needs  
283 several more hours of incubation to obtain a quantifiable reporter signal (**Figure 1C**;  
284 fluorescent signal at 12h). In contrast, with CEI even a small delay or minor reduction  
285 in the cell-cell fusion process can be monitored for inhibitors or mutant spike proteins.

286 Routine antiviral screens often rely on phenotypic assays, such as the reduction in  
287 virus-induced cytopathic effect (CPE) or plaque formation, and generally make use of  
288 a microscopic, luminescent, fluorescent, or colorimetric readout. Some of the  
289 disadvantages of these techniques are that can be slow (multiple days), are typically  
290 time consuming, require multiple handling steps and rely on optimal endpoint selection

291 in order to achieve good assay quality. CEI offers a valuable addition to this array of  
292 antiviral methods with real-time measurements and an objective readout. Furthermore,  
293 CEI is able to measure nanoscale morphological changes and is thus a more sensitive  
294 tool to analyze cellular processes such as highly dynamic membrane fusion. Also, a  
295 CEI-based fusion assay can be performed with fusion protein-expressing cells as an  
296 alternative to authentic virus, allowing antiviral analysis of entry inhibitors at a lower  
297 biosafety level, which might be of particular interest for pathogens that require BSL3  
298 facilities.

299 Entry of viruses into host target cells is an attractive target for antiviral intervention (33).  
300 Inhibiting the virus before it enters the host cell, e.g., by targeting the viral fusion  
301 machinery, is a potent antiviral strategy that has been successful for the treatment of  
302 human immunodeficiency virus (34). Furthermore, as these membrane fusion  
303 processes are critical for viral infection, targets are often well conserved across  
304 different viral families (35, 36), suggesting the potential for developing pan-viral broad  
305 spectrum inhibitors.

306 Here, we exploited CEI to analyze the activity of fusion inhibitors. In our comparative  
307 study of entry inhibitors for SARS-CoV-2, we observed differential potency in our CEI-  
308 based cell-cell fusion assay between an attachment inhibitor (Ab R001) and a fusion  
309 inhibitor (EK1). The limited fusion inhibitory effect of the S-binding R001 might be  
310 related to the excessive expression of the spike protein on the surface of transfected  
311 HEK293T cells, which greatly differs from the number of fusion proteins on the viral  
312 envelop in antiviral CPE-based cellular assays. In that perspective the concentration  
313 Ab (10  $\mu\text{g/ml}$ ) used in our cell-cell fusion experiments was most likely suboptimal.  
314 Accordingly, Zhao *et al.* observed for anti-spike monoclonal antibodies 15-20 fold less  
315 activity against cell-cell fusion as compared to pseudotyped SARS-CoV-2 virus

316 infection (37). In addition, in a recent reported luciferase-based reporter gene fusion  
317 assay for SARS-CoV-2, a concentration of 28 µg/ml Ab R001 resulted in approximately  
318 60-70% inhibition of cell-cell fusion, thus, still no complete protection (25), however,  
319 the spike-expressing cells were pre-incubated with the Ab before the overlay. Thus, it  
320 seems that attachment inhibitors have less opportunity to prevent the initiation of the  
321 fusion process once the spike proteins are being triggered by ACE2. Nevertheless,  
322 antivirals that interfere with the conformational changes and refolding of the S2 subunit  
323 have a stronger inhibitory effect on membrane fusion and can be clearly identified  
324 through CEI. Our data also indicated that expression of TMPRSS2 is not a prerequisite  
325 to obtain S-mediated cell-cell fusion. In a CEI experimental setting, other host  
326 proteases, such as matrix metalloproteases might activate the SARS-Cov-2 S  
327 glycoprotein during the process of syncytium formation (38).

328 Interestingly, CEI can also be employed to study the fusogenic properties of spike  
329 proteins from different SARS-CoV-2 VOCs. In line with several reports (9, 10, 31), with  
330 our CEI based cell-cell fusion assay we also measured a reduced fusion activity for the  
331 spike protein of the Omicron BA.1 variant. Although subsequent flow cytometric  
332 analysis of the spike levels on the surface of the transfected HEK293T cells did not  
333 indicate an attenuated protein expression for Omicron (as compared to the original  
334 Wuhan-Hu-1), flow cytometry does not provide details on the amount of processed  
335 (S1/S2 cleaved) spike or the trimeric nature of the SARS-CoV-2 fusion protein. As we  
336 demonstrated that the cell-cell fusion process is strongly depending on the amount of  
337 wild-type spike protein expressed on the surface of the HEK293T cells, the proteolytic  
338 state of S will undoubtedly contribute to the efficiency of the fusion process.

339 In summary, we have developed an assay that makes use of cell-based electrical  
340 impedance to monitor in real time cell-cell fusion for SARS-CoV-2, which provides a

341 powerful tool to investigate specific cell membrane fusion events. The CEI technique  
342 can add valuable information on the fusion process of circulating enveloped viruses  
343 and on the mode of action of new antivirals. As such, CEI can support profiling efforts  
344 of novel potent fusion inhibitors for SARS-CoV-2, and in turn can help in the  
345 development of next generation inhibitors with improved antiviral activity.

## 346 **Materials and Methods**

### 347 **Cell lines**

348 Human Embryonic Kidney 293T (HEK293T) cells (Cat. No. CRL-3216) and Human  
349 adenocarcinomic alveolar epithelial cells A549 (Cat. No. CCL-185), were obtained from  
350 ATCC as mycoplasma-free stocks and grown in Dulbecco's Modified Eagle Medium  
351 (DMEM, Thermo Fisher Scientific) supplemented with 10% (*v / v*) fetal bovine serum  
352 (FBS; HyClone). A549.ACE2<sup>+</sup> cells were generated by stably transducing A549 with  
353 ACE2 (23), by second generation lentiviral transduction with a lentiviral transfer vector  
354 containing the human ACE2 coding sequence as described elsewhere (24). Cell lines  
355 were maintained at 37°C in a humidified environment with 5% CO<sub>2</sub>. Cells were  
356 passaged every 3 to 4 days.

### 357 **Antibodies and compounds**

358 **Antibodies.** The following antibodies were used for flow cytometry: rabbit monoclonal  
359 SARS-CoV-2 spike-specific antibody [R001] (Cat. n° 40592-R001, Sino Biological),  
360 mouse monoclonal SARS-CoV-2 spike-specific antibody [MM57] (cat. n° 40592-  
361 MM57, Sino Biological), fluorescently-labelled Alexa Fluor 647 (AF647) goat anti-  
362 Rabbit IgG monoclonal antibody (Cat. n° 4414, Cell Signaling Technologies), and  
363 phycoerythrin (PE)-labelled goat anti-mouse IgG (cat. n° 405307, BioLegend).



364 **Compounds.** Wuhan-Hu-1 SARS-CoV-2 receptor binding domain was purchased  
365 from Sino Biological (2019-nCoV spike RBD, Cat n° 40592-VNAH). Urtica dioica  
366 agglutinin (UDA) from Stinging Nettle was obtained from EY Laboratories, CA, USA  
367 (Cat. n° L-8005-1). EK1, with amino acid sequence  
368 GSLDQINVTFLDLEYEMKKLEEAIAIKKLEESYIDLKELG, was synthesized as a custom  
369 peptide with N-terminal acetylation and C-terminal amidation (Life Technologies  
370 Europe Bv).

### 371 **Plasmids**

372 All plasmids were generated with the NEBuilder DNA assembly kit (New England  
373 Biolabs), using a pCAGGS plasmid digested with EcoRV-HF and HindIII-HF (New  
374 England Biolabs) as backbone. For pCAGGS.SARS-CoV-2\_Δ19 a PCR fragment  
375 encoding codon-optimized SARS-CoV-2 Wuhan-Hu-1 spike protein (amplified from  
376 pCMV3-C-Myc; VG40589-CM, SinoBiological) with a C-terminal 19 amino acid  
377 deletion as described in (39) was cloned into the pCAGGS backbone. For  
378 pCAGGS.SARS-CoV-2\_Δ19\_fpl\_mNG2(11) the same cloning strategy was used as  
379 the previous plasmid, but with the addition of a PCR fragment containing a 12 amino  
380 acid flexible protein linker (fpl) and a modified 11<sup>th</sup> betasheet of mNeonGreen  
381 (mNG2(11)) (40). For pCAGGS.SARS-CoV-2 Δ19 [D614G], PCR was performed on  
382 the codon-optimized SARS-CoV-2 Wuhan spike sequence in two parts to introduce a  
383 D614G amino acid mutation in the overlapping region between fragments. For the  
384 pCAGGS.SARS-CoV-2\_Δ19 [N1074Q+N1098Q]\_fpl\_mNG2(11), pCAGGS.SARS-  
385 CoV-2\_Δ19 [N1134Q+N1158Q]\_fpl\_mNG2(11) and pCAGGS.SARS-CoV-2\_Δ19  
386 [N1173Q+N1194Q]\_fpl\_mNG2(11) mutant plasmids, mutations were again introduced  
387 in overlaps of the PCR fragments obtained from PCR of the codon-optimized Wuhan  
388 spike sequence. Fragments were ligated in combination with a PCR fragment

389 containing the fpl and mNG2(11) sequences. pCAGGS.SARS-CoV-2\_S  
390  $\Delta$ 19\_Omicron\_fpl\_mNG2(11) was cloned via PCR performed on cDNA synthesized  
391 from an RNA extract of a SARS-CoV-2 Omicron BA.1 virus stock (SARS-CoV-2  
392 B.1.1529). Fragments were again ligated with a PCR fragment containing the fpl and  
393 mNG2(11) sequences. pCAGGS.SARS-CoV-2\_S  $\Delta$ 19\_Omicron-Opt\_fpl\_mNG2(11)  
394 was assembled from a PCR performed on a codon-optimized SARS-CoV-2 Omicron  
395 BA.1 sequence synthesized by Genscript. Fragments were assembled with a PCR  
396 fragment containing the fpl and mNG2(11) sequences. pcDNA3.1.mNG2(1-10) was  
397 generated through NEBuilder DNA assembly of a pcDNA3.1 vector (Thermo Fisher  
398 Scientific), amplified by PCR, and 10 betasheets of a modified mNeonGreen  
399 synthesized by Genscript. For the transfection of TMPRSS2, the pcDNA3.1+ plasmid  
400 encoding TMPRSS2-DYK was purchased from Genscript. All plasmids were  
401 sequence-verified before use with Sanger sequencing (Macrogen).

## 402 **Transient transfection**

403 Prior to transfection HEK293T and A549 cells were plated in 6-well plates to reach 50-  
404 70% and 80-90% confluency, respectively, after an overnight incubation at 37 °C.  
405 Lipofectamine LTX (Invitrogen) was used for the transfection of plasmid DNA  
406 according to the manufacturer's protocol.

## 407 **Split neongreen cell-cell fusion assay**

408 Transfection mixes were prepared with 2.5  $\mu$ g pCAGGS.SARS-CoV-  
409 2\_S $\Delta$ 19\_fpl\_mNG2(11)\_opt plasmid encoding for SARS-CoV-2 spike protein for  
410 HEK293T transfection; and 2.5  $\mu$ g pcDNA3.1.mNG2(1-10) for A549.ACE2<sup>+</sup>  
411 transfection. HEK293T cells were allowed to incubate for 24 h for efficient exogenous  
412 spike protein expression. At 6 h post transfection, transfected A549.ACE2<sup>+</sup> cells were

413 digested with 0.05% trypsin, washed, resuspended and counted on a Luna cell counter  
414 (Logos Biosystems), added to a 96-well plate at  $2.2 \times 10^4$  cells per well and incubated  
415 for 18 h. Next day, transfected HEK293T cells were collected, digested with 0.25%  
416 trypsin, washed, resuspended, counted and administered to the A549.ACE2<sup>+</sup> cells at  
417  $2 \times 10^4$  cells per well. Fusion events were visualized for 24 h at 20 min intervals using  
418 the IncuCyte® S3 Live-Cell Analysis System (Sartorius). Phase contrast and GFP  
419 images (4 per well) were taken using a 20x objective lens at 10-minute intervals for a  
420 5 hours period, and 1 hour intervals afterwards. Image processing was performed  
421 using the IncuCyte® software.

## 422 **Cellular Electrical Impedance cell-cell fusion assay**

423 The xCELLigence Real-Time Cell Analyzer (RTCA) DP instrument (Agilent, Santa  
424 Clara, CA, USA) was used to measure changes in cellular impedance following  
425 addition of cells on top of the monolayer. Briefly, RTCA E-plate VIEW 16 plates with  
426 embedded golden electrodes (#300600880, Agilent, Santa Clara, CA, USA) were used  
427 for the experiments. First a blank measurement of a sensor E-Plate VIEW 16 PET was  
428 performed (only medium). This was followed by the addition of 15,000 A549.ACE2<sup>+</sup>  
429 cells (in growth medium supplemented with 2% FBS) to each well. E-plates were  
430 placed at room temperature for 15 min and then transferred to the xCELLigence RTCA  
431 instrument, located in an incubator at 37 °C and 5% CO<sub>2</sub>. The attachment and  
432 overnight growth of the cells was monitored (measurement every 20 min). Cell  
433 adherence and growth result in an increase in CI followed by a flattening of the curve  
434 when the cells reach confluency. In parallel, HEK293T cells (400,000 cells per well in  
435 growth medium supplemented with 10% FBS) were transfected with an S-expressing  
436 plasmid. Following overnight incubation, a short CEI normalisation measurement (5  
437 consecutive measurements, every 5 s) was performed on the A549 cell monolayer. In

438 parallel, spike-expressing transfected HEK293T cells were collected, digested with  
439 0.25% trypsin, washed, resuspended, counted and administered to the A549.ACE2<sup>+</sup>  
440 cells at 15,000 cells per well (= overlay step), simultaneously with the test compounds  
441 or vehicle control. To quantify spike-independent CI changes resulting from the  
442 overlay, an equal number of HEK293T cells mock-transfected with empty vector is  
443 added to the A549.ACE2<sup>+</sup> cells instead. After the overlay, the A549.ACE2<sup>+</sup> monolayer  
444 is monitored over time for 24h and data points are displayed every 2 minutes.

### 445 **CEI data analysis**

446 The CEI biosensor monitors the Cell Index (CI), a dimensionless parameter derived  
447 from the frequency-dependent resistance (R) component of the impedance value (Z)  
448 at 10, 25 and 50 kHz frequency. Raw CI values were used as a starting point for data  
449 manipulations. All data are first normalized to the baseline before the overlay step, to  
450 reduce inter-well variation. Spike-dependent fusion was calculated by subtracting the  
451 CI values of A549.ACE2<sup>+</sup>:HEK293T.empty\_vector overlay (spike independent) from  
452 the CI changes of the A549.ACE2<sup>+</sup>:HEK293T.spike overlay (spike-dependent +  
453 independent). This results in a baseline-corrected normalized CI measure. The  
454 maximal CI change of the A549.ACE2<sup>+</sup>:HEK293T.spike overlay (of the baseline  
455 corrected CI value) in the absence of compound, is then set to 100% and the maximal  
456 CI change of the conditions with compound are reported relative to this value. CEI data  
457 were preprocessed, normalized and baseline-corrected using an in-house built Matlab  
458 script (version R2016b, Mathworks). IC<sub>50</sub> calculation was done in GraphPad Prism  
459 (version 9) using nonlinear regression: log[inhibitor] vs. normalized response variable  
460 slope.

## 461 **Flow cytometry**

462 For the cell surface staining of spike-transfected HEK293T cells, cells were collected,  
463 washed in PBS, resuspended, transferred to tubes and samples were centrifuged in a  
464 cooled centrifuge (4 °C) at 500 g for 5 min. After removal of the supernatant, cells were  
465 incubated with the primary (anti-spike) antibody (30 min at 4 °C), washed in PBS,  
466 followed by a 30 min incubation at 4 °C with the secondary (labeled) antibody, and  
467 washed again. Finally, samples were stored in PBS containing 2 % formaldehyde  
468 (VWR Life Science AMRESCO). Acquisition of all samples was done on a BD  
469 FACSCelesta flow cytometer (BD Biosciences) with BD FACSDiva v8.0.1 software.  
470 Flow cytometric data were analyzed in FlowJo v10.1 (Tree Star). Subsequent analysis  
471 with appropriate cell gating was performed to exclude cell debris and doublet cells, in  
472 order to acquire data on living, single cells only.

## 473 **Statistical analysis**

474 Data were visualized as means  $\pm$  standard deviation (SD) and were analyzed using  
475 GraphPad Prism 9.3.1 software.

476

## 477 **Supplemental material**

478 Supplemental material is available online only.

479 **Supplemental file 1**, PDF file, 0.97 MB

480 Supplemental movie 1, MP4 file, 19.6 MB

481 Supplemental movie 2, MP4 file, 17.5 MB

## 482 **Acknowledgements**

483 We thank Geert Schoofs for technical support to the flow cytometry experiments, and  
484 Anita Camps and Eef Meyen for their help with the cell cultures. Images were created  
485 with support from BioRender.com.

## 486 **Declarations of interest**

487 The authors declare no conflict of interest

## 488 **Author contributions**

489 K.V., E.V., J.D. and J.S. designed research; E.V., J.D., E.M., B.P., J.S. and S.N.  
490 performed research; E.V., J.D., J.S., S.N. and K.V. analyzed the data; E.V., J.D., A.S.  
491 and K.V. wrote the manuscript; D.S. contributed new reagents/analytic tools. All of the  
492 authors discussed the results and commented on the manuscript.

## 493 **Funding**

494 This research was supported by internal grants of the Division of Virology and  
495 Chemotherapy (Rega Institute for Medical Research, KU Leuven, Leuven, Belgium).

496 A.S. acknowledges funding from Fundació La Marató de TV3, Spain (Project No.  
497 202135-30).

## 498 References

- 499 1. Wrapp D, Wang N, Corbett KS, Goldsmith JA, Hsieh CL, Abiona O, Graham  
500 BS, McLellan JS. 2020. Cryo-EM structure of the 2019-nCoV spike in the  
501 prefusion conformation. *Science* 367:1260-1263.  
502 <https://doi.org/10.1126/science.abb2507>.
- 503 2. Cerutti G, Guo Y, Liu L, Liu L, Zhang Z, Luo Y, Huang Y, Wang HH, Ho DD,  
504 Sheng Z, Shapiro L. 2022. Cryo-EM structure of the SARS-CoV-2 Omicron  
505 spike. *Cell Reports*:110428. <https://doi.org/10.1016/j.celrep.2022.110428>.
- 506 3. Cui Z, Liu P, Wang N, Wang L, Fan K, Zhu Q, Wang K, Chen R, Feng R, Jia Z,  
507 Yang M, Xu G, Zhu B, Fu W, Chu T, Feng L, Wang Y, Pei X, Yang P, Xie XS,  
508 Cao L, Cao Y, Wang X. 2022. Structural and functional characterizations of  
509 infectivity and immune evasion of SARS-CoV-2 Omicron. *Cell*.  
510 <https://doi.org/10.1016/j.cell.2022.01.019>.
- 511 4. Walls AC, Park YJ, Tortorici MA, Wall A, McGuire AT, Velesler D. 2020.  
512 Structure, Function, and Antigenicity of the SARS-CoV-2 Spike Glycoprotein.  
513 *Cell*. <https://doi.org/10.1016/j.cell.2020.02.058>.
- 514 5. Hoffmann M, Kleine-Weber H, Schroeder S, Kruger N, Herrler T, Erichsen S,  
515 Schiergens TS, Herrler G, Wu NH, Nitsche A, Muller MA, Drosten C, Pohlmann  
516 S. 2020. SARS-CoV-2 Cell Entry Depends on ACE2 and TMPRSS2 and Is  
517 Blocked by a Clinically Proven Protease Inhibitor. *Cell* 181:271-280 e8.  
518 <https://doi.org/10.1016/j.cell.2020.02.052>.
- 519 6. Jafary F, Jafari S, Ganjalikhany MR. 2021. In silico investigation of critical  
520 binding pattern in SARS-CoV-2 spike protein with angiotensin-converting  
521 enzyme 2. *Sci Rep* 11:6927. <https://doi.org/10.1038/s41598-021-86380-2>.
- 522 7. Shang J, Wan Y, Luo C, Ye G, Geng Q, Auerbach A, Li F. 2020. Cell entry  
523 mechanisms of SARS-CoV-2. *Proc Natl Acad Sci U S A* 117:11727-11734.  
524 <https://doi.org/10.1073/pnas.2003138117>.
- 525 8. Zhang L, Mann M, Syed ZA, Reynolds HM, Tian E, Samara NL, Zeldin DC,  
526 Tabak LA, Ten Hagen KG. 2021. Furin cleavage of the SARS-CoV-2 spike is  
527 modulated by O-glycosylation. *Proc Natl Acad Sci U S A* 118.  
528 <https://doi.org/10.1073/pnas.2109905118>.
- 529 9. Meng B, Abdullahi A, Ferreira I, Goonawardane N, Saito A, Kimura I, Yamasoba  
530 D, Gerber PP, Fathi S, Rathore S, Zepeda SK, Papa G, Kemp SA, Ikeda T,  
531 Toyoda M, Tan TS, Kuramochi J, Mitsunaga S, Ueno T, Shirakawa K, Takaori-  
532 Kondo A, Brevini T, Mallery DL, Charles OJ, Collaboration C-NBC-, Genotype  
533 to Phenotype Japan Consortium m, Ecuador CC, Bowen JE, Joshi A, Walls AC,  
534 Jackson L, Martin D, Smith KGC, Bradley J, Briggs JAG, Choi J, Madisson E,  
535 Meyer K, Mlcochova P, Ceron-Gutierrez L, Doffinger R, Teichmann SA, Fisher  
536 AJ, Pizzuto MS, de Marco A, Corti D, Hosmillo M, Lee JH, James LC, Thukral  
537 L, et al. 2022. Altered TMPRSS2 usage by SARS-CoV-2 Omicron impacts  
538 tropism and fusogenicity. *Nature*. <https://doi.org/10.1038/s41586-022-04474-x>.
- 539 10. Suzuki R, Yamasoba D, Kimura I, Wang L, Kishimoto M, Ito J, Morioka Y, Nao  
540 N, Nasser H, Uriu K, Kosugi Y, Tsuda M, Orba Y, Sasaki M, Shimizu R,  
541 Kawabata R, Yoshimatsu K, Asakura H, Nagashima M, Sadamasu K,  
542 Yoshimura K, Genotype to Phenotype Japan C, Sawa H, Ikeda T, Irie T,  
543 Matsuno K, Tanaka S, Fukuhara T, Sato K. 2022. Attenuated fusogenicity and  
544 pathogenicity of SARS-CoV-2 Omicron variant. *Nature*.  
545 <https://doi.org/10.1038/s41586-022-04462-1>.



- 546 11. Iwata-Yoshikawa N, Kakizaki M, Shiwa-Sudo N, Okura T, Tahara M, Fukushi S,  
547 Maeda K, Kawase M, Asanuma H, Tomita Y, Takayama I, Matsuyama S,  
548 Shirato K, Suzuki T, Nagata N, Takeda M. 2022. Essential role of TMPRSS2 in  
549 SARS-CoV-2 infection in murine airways. *Nat Commun* 13:6100.  
550 <https://doi.org/10.1038/s41467-022-33911-8>.
- 551 12. Koch J, Uckelej ZM, Doldan P, Stanifer M, Boulant S, Lozach PY. 2021.  
552 TMPRSS2 expression dictates the entry route used by SARS-CoV-2 to infect  
553 host cells. *EMBO J* 40:e107821. <https://doi.org/10.15252/emboj.2021107821>.
- 554 13. Laporte M, Raeymaekers V, Van Berwaer R, Vandeput J, Marchand-Casas I,  
555 Thibaut HJ, Van Looveren D, Martens K, Hoffmann M, Maes P, Pohlmann S,  
556 Naesens L, Stevaert A. 2021. The SARS-CoV-2 and other human coronavirus  
557 spike proteins are fine-tuned towards temperature and proteases of the human  
558 airways. *PLoS Pathog* 17:e1009500.  
559 <https://doi.org/10.1371/journal.ppat.1009500>.
- 560 14. Xu C, Wang Y, Liu C, Zhang C, Han W, Hong X, Wang Y, Hong Q, Wang S,  
561 Zhao Q, Wang Y, Yang Y, Chen K, Zheng W, Kong L, Wang F, Zuo Q, Huang  
562 Z, Cong Y. 2021. Conformational dynamics of SARS-CoV-2 trimeric spike  
563 glycoprotein in complex with receptor ACE2 revealed by cryo-EM. *Sci Adv* 7.  
564 <https://doi.org/10.1126/sciadv.abe5575>.
- 565 15. Giaever I, Keese CR. 1984. Monitoring fibroblast behavior in tissue culture with  
566 an applied electric field. *Proc Natl Acad Sci U S A* 81:3761-4.  
567 <https://doi.org/10.1073/pnas.81.12.3761>.
- 568 16. Xu Y, Xie X, Duan Y, Wang L, Cheng Z, Cheng J. 2016. A review of impedance  
569 measurements of whole cells. *Biosens Bioelectron* 77:824-36.  
570 <https://doi.org/10.1016/j.bios.2015.10.027>.
- 571 17. Atienza JM, Yu N, Kirstein SL, Xi B, Wang X, Xu X, Abassi YA. 2006. Dynamic  
572 and label-free cell-based assays using the real-time cell electronic sensing  
573 system. *Assay Drug Dev Technol* 4:597-607.  
574 <https://doi.org/10.1089/adt.2006.4.597>.
- 575 18. Ngoc Le HT, Kim J, Park J, Cho S. 2019. A Review of Electrical Impedance  
576 Characterization of Cells for Label-Free and Real-Time Assays. *BioChip Journal*  
577 13:295-305. <https://doi.org/10.1007/s13206-019-3401-6>.
- 578 19. Stupin DD, Kuzina EA, Abelit AA, Emelyanov AK, Nikolaev DM, Ryazantsev  
579 MN, Koniakhin SV, Dubina MV. 2021. Bioimpedance Spectroscopy: Basics and  
580 Applications. *ACS Biomater Sci Eng* 7:1962-1986.  
581 <https://doi.org/10.1021/acsbiomaterials.0c01570>.
- 582 20. Pennington MR, Van de Walle GR. 2017. Electric Cell-Substrate Impedance  
583 Sensing To Monitor Viral Growth and Study Cellular Responses to Infection with  
584 Alphaherpesviruses in Real Time. *mSphere* 2.  
585 <https://doi.org/10.1128/mSphere.00039-17>.
- 586 21. Oeyen M, Meyen E, Doijen J, Schols D. 2022. In-Depth Characterization of Zika  
587 Virus Inhibitors Using Cell-Based Electrical Impedance. *Microbiol Spectr*  
588 10:e0049122. <https://doi.org/10.1128/spectrum.00491-22>.
- 589 22. Watterson D, Robinson J, Chappell KJ, Butler MS, Edwards DJ, Fry SR,  
590 Birmingham IM, Cooper MA, Young PR. 2016. A generic screening platform for  
591 inhibitors of virus induced cell fusion using cellular electrical impedance. *Sci*  
592 *Rep* 6:22791. <https://doi.org/10.1038/srep22791>.
- 593 23. Vanhulle E, D'Huys T, Provinciael B, Stroobants J, Camps A, Noppen S, Schols  
594 D, Van Damme EJM, Maes P, Stevaert A, Vermeire K. 2022. Carbohydrate-  
595 binding protein from stinging nettle as fusion inhibitor for SARS-CoV-2 variants

- 596 of concern. *Front Cell Infect Microbiol* 12:989534.  
597 <https://doi.org/10.3389/fcimb.2022.989534>.
- 598 24. Vanhulle E, Stroobants J, Provinciael B, Camps A, Noppen S, Maes P, Vermeire  
599 K. 2022. SARS-CoV-2 Permissive glioblastoma cell line for high throughput  
600 antiviral screening. *Antiviral Res* 203:105342.  
601 <https://doi.org/10.1016/j.antiviral.2022.105342>.
- 602 25. Chan SW. 2022. Fusion assays for screening of fusion inhibitors targeting  
603 SARS-CoV-2 entry and syncytia formation. *Front Pharmacol* 13:1007527.  
604 <https://doi.org/10.3389/fphar.2022.1007527>.
- 605 26. Xia S, Liu M, Wang C, Xu W, Lan Q, Feng S, Qi F, Bao L, Du L, Liu S, Qin C,  
606 Sun F, Shi Z, Zhu Y, Jiang S, Lu L. 2020. Inhibition of SARS-CoV-2 (previously  
607 2019-nCoV) infection by a highly potent pan-coronavirus fusion inhibitor  
608 targeting its spike protein that harbors a high capacity to mediate membrane  
609 fusion. *Cell Res* 30:343-355. <https://doi.org/10.1038/s41422-020-0305-x>.
- 610 27. Duan Q, Xia S, Jiao F, Wang Q, Wang R, Lu L, Jiang S, Xu W. 2022. A Modified  
611 Fibronectin Type III Domain-Conjugated, Long-Acting Pan-Coronavirus Fusion  
612 Inhibitor with Extended Half-Life. *Viruses* 14.  
613 <https://doi.org/10.3390/v14040655>.
- 614 28. Lan Q, Chan JF, Xu W, Wang L, Jiao F, Zhang G, Pu J, Zhou J, Xia S, Lu L,  
615 Yuen KY, Jiang S, Wang Q. 2022. A Palmitic Acid-Conjugated, Peptide-Based  
616 pan-CoV Fusion Inhibitor Potently Inhibits Infection of SARS-CoV-2 Omicron  
617 and Other Variants of Concern. *Viruses* 14. <https://doi.org/10.3390/v14030549>.
- 618 29. Vanhulle E, Provinciael B, Stroobants J, Camps A, Maes P, Vermeire K. 2022.  
619 Intracellular flow cytometry complements RT-qPCR detection of circulating  
620 SARS-CoV-2 variants of concern. *BioTechniques* 72:1-10.  
621 <https://doi.org/10.2144/btn-2022-0018>.
- 622 30. Vanderheijden N, Stevaert A, Xie J, Ren X, Barbezange C, Noppen S,  
623 Desombere I, Verhasselt B, Geldhof P, Vereecke N, Stroobants V, Oh D,  
624 Vanhee M, Naesens LMJ, Nauwynck HJ. 2021. Functional Analysis of Human  
625 and Feline Coronavirus Cross-Reactive Antibodies Directed Against the SARS-  
626 CoV-2 Fusion Peptide. *Front Immunol* 12:790415.  
627 <https://doi.org/10.3389/fimmu.2021.790415>.
- 628 31. Zhao H, Lu L, Peng Z, Chen LL, Meng X, Zhang C, Ip JD, Chan WM, Chu AW,  
629 Chan KH, Jin DY, Chen H, Yuen KY, To KK. 2021. SARS-CoV-2 Omicron  
630 variant shows less efficient replication and fusion activity when compared with  
631 delta variant in TMPRSS2-expressed cells. *Emerg Microbes Infect*:1-18.  
632 <https://doi.org/10.1080/22221751.2021.2023329>.
- 633 32. Montefiori DC. 2009. Measuring HIV neutralization in a luciferase reporter gene  
634 assay. *Methods Mol Biol* 485:395-405. [https://doi.org/10.1007/978-1-59745-  
635 170-3\\_26](https://doi.org/10.1007/978-1-59745-170-3_26).
- 636 33. Tang T, Bidon M, Jaimes JA, Whittaker GR, Daniel S. 2020. Coronavirus  
637 membrane fusion mechanism offers a potential target for antiviral development.  
638 *Antiviral Res* 178:104792. <https://doi.org/10.1016/j.antiviral.2020.104792>.
- 639 34. Kilby JM, Hopkins S, Venetta TM, DiMassimo B, Cloud GA, Lee JY, Alldredge  
640 L, Hunter E, Lambert D, Bolognesi D, Matthews T, Johnson MR, Nowak MA,  
641 Shaw GM, Saag MS. 1998. Potent suppression of HIV-1 replication in humans  
642 by T-20, a peptide inhibitor of gp41-mediated virus entry. *Nat Med* 4:1302-7.  
643 <https://doi.org/10.1038/3293>.

- 644 35. Lozada C, Barlow TMA, Gonzalez S, Lubin-Germain N, Ballet S. 2021.  
645 Identification and Characteristics of Fusion Peptides Derived From Enveloped  
646 Viruses. *Front Chem* 9:689006. <https://doi.org/10.3389/fchem.2021.689006>.  
647 36. Poubourios P, Center RJ, Wilson KA, Kemp BE, Kobe B. 1999. Evolutionary  
648 conservation of the membrane fusion machine. *IUBMB Life* 48:151-6.  
649 <https://doi.org/10.1080/713803503>.  
650 37. Zhao M, Su PY, Castro DA, Tripler TN, Hu Y, Cook M, Ko AI, Farhadian SF,  
651 Israelow B, Dela Cruz CS, Xiong Y, Sutton RE, Yale IRT. 2021. Rapid, reliable,  
652 and reproducible cell fusion assay to quantify SARS-Cov-2 spike interaction  
653 with hACE2. *PLoS Pathog* 17:e1009683.  
654 <https://doi.org/10.1371/journal.ppat.1009683>.  
655 38. Nguyen HT, Zhang S, Wang Q, Anang S, Wang J, Ding H, Kappes JC, Sodroski  
656 J. 2020. Spike glycoprotein and host cell determinants of SARS-CoV-2 entry  
657 and cytopathic effects. *J Virol* 95. <https://doi.org/10.1128/JVI.02304-20>.  
658 39. Ou X, Liu Y, Lei X, Li P, Mi D, Ren L, Guo L, Guo R, Chen T, Hu J, Xiang Z, Mu  
659 Z, Chen X, Chen J, Hu K, Jin Q, Wang J, Qian Z. 2020. Characterization of  
660 spike glycoprotein of SARS-CoV-2 on virus entry and its immune cross-  
661 reactivity with SARS-CoV. *Nat Commun* 11:1620.  
662 <https://doi.org/10.1038/s41467-020-15562-9>.  
663 40. Feng S, Sekine S, Pessino V, Li H, Leonetti MD, Huang B. 2017. Improved split  
664 fluorescent proteins for endogenous protein labeling. *Nat Commun* 8:370.  
665 <https://doi.org/10.1038/s41467-017-00494-8>.

666

## 667 **Figure legends**

668 **FIG 1** SARS-CoV-2 spike-transfected cells mimic viral envelope for fusion with ACE2<sup>+</sup>  
669 target cell membrane. **(A)** Schematic representation of the fusion process for SARS-  
670 CoV-2 and a potential target for fusion inhibitors. See text for detailed description of  
671 the fusion process. FP, fusion peptide; HR, heptad repeat domain; 6-HB, 6 helix  
672 bundle; FI, fusion inhibitor. **(B)** Schematic representation of a split neongreen fusion  
673 assay (figure adapted from (23)). A549.ACE2<sup>+</sup> cells (transfected to express the first 10  
674 betasheets of neongreen) were overlaid with HEK293T cells co-transfected with a  
675 plasmid encoding the SARS-CoV-2 spike protein and a plasmid encoding the 11<sup>th</sup>  
676 betasheet of neongreen. Only cell-cell fusion of an A549 cell with a HEK293T cell will  
677 result in the assembly of a functional neongreen protein and give a green fluorescence  
678 signal as the former expresses spike and the latter human ACE2. Light microscopic  
679 picture shows fused cells with neongreen expression (20x magnification). **(C)** Same as  
680 in (B). A549.ACE2<sup>+</sup> cells were overlaid with HEK293T cells either transfected (TF)  
681 with an empty vector (left panels; mock-TF), or with Wuhan-Hu-1 S protein and left  
682 untreated (middle) or treated with the fusion inhibitor EK1 (2 μM; right panels). Light  
683 microscopic pictures were taken at 3 and 12 hours post overlay (20x magnification).  
684 Note that cell-cell fusion in the untreated spike-transfected condition is already visible  
685 at 3h post overlay but that neongreen fluorescence is still absent. Cartoons were  
686 created with BioRender ([www.biorender.com](http://www.biorender.com)).

687 **FIG 2** Comparison of impedance signal of A549.ACE2<sup>+</sup> cells overlaid with mock-  
688 transfected versus Wuhan-Hu-1 SARS-CoV-2 spike-transfected HEK293T cells. At  
689 time point 0, A549.ACE2<sup>+</sup> cells were seeded and impedance was recorded of the  
690 proliferating cell monolayer. At 24h post plating (phase #1), empty vector- (grey) and  
691 spike-transfected (blue) HEK293T cells were added. The graph depicts the raw

692 impedance signal (expressed as cell index) over time of 4 technical replicates (mean  
693  $\pm$  SD). Vertical dotted lines 1 to 3 indicate important phases, which are further  
694 explained in the text. Note the bigger variation in CI response between the replicates  
695 during the disruption of the cell monolayer (starting at phase #2).

696 **FIG 3** SARS-CoV-2 spike expression correlates with the intensity and kinetics of  
697 impedance signal in CEI quantified cell-cell fusion assay. **(A)** Different ratios of  
698 A549.ACE2<sup>+</sup> acceptor (A) and trypsinized Wuhan-Hu-1 spike-transfected HEK293T  
699 donor (D) cells. In the 1:1 cell ratio, 15,000 cells of acceptor and donor were used. The  
700 graph depicts the impedance signal (expressed as cell index) over time, starting at the  
701 moment of cell overlay, of 4 technical replicates (mean  $\pm$  SD), normalized to the mock-  
702 transfected condition (grey horizontal curve). **(B)** Different amounts of Wuhan-Hu-1  
703 SARS-CoV-2 S expressing plasmid DNA (as indicated) were added to 200  $\mu$ l  
704 transfection mixture for the transfection of 400,000 HEK293T donor cells. The next  
705 day, cells were trypsinized and added to an A549.ACE2<sup>+</sup> acceptor cell monolayer. The  
706 graph depicts the impedance signal of 2 technical replicates (mean  $\pm$  SD), normalized  
707 to the mock-transfected condition (grey horizontal curve). Bar histograms at the right  
708 show the background-subtracted mean fluorescence intensity (MFI) values (on a  
709 logarithmic scale) for cell surface S staining (Ab R001) of the transfected cells by flow  
710 cytometry. See also Supplementary Figure 1D for corresponding flow cytometric  
711 histogram plots. **(C)** Comparison of impedance signal of A549.ACE2<sup>+</sup> cells either  
712 mock-transfected (dark blue) versus TMPRSS2-transfected (light blue) and overlaid  
713 by trypsinized Wuhan-Hu-1 SARS-CoV-2 S transfected HEK293T cells. The graph  
714 depicts the impedance signal of 2 technical replicates (mean  $\pm$  SD), normalized to the  
715 corresponding mock-transfected HEK293T condition (grey horizontal curve).

716 **FIG 4** Validation of CEI cell-cell fusion assay with entry inhibitors of SARS-CoV-2. **(A)**  
717 The fusion inhibitor EK1 inhibits cell-cell fusion of A549.ACE2<sup>+</sup> acceptor with S-  
718 transfected (20A.EU2 strain) donor cells. Inhibitor and donor cells were added  
719 simultaneously to the A549.ACE2<sup>+</sup> acceptor cells. **(B)** Same as in (A) but for the  
720 attachment inhibitor R001, an RBD binding antibody that neutralizes viral entry of  
721 authentic SARS-CoV-2 virus, and with SARS-CoV-2 Wuhan-Hu-1 S. **(C)** Same as in  
722 (A) but for the entry inhibitor UDA, a carbohydrate-binding small monomeric plant lectin  
723 from stinging nettle rhizomes. The graphs on the left depict the impedance signal of 2  
724 technical replicates (mean  $\pm$  SD), normalized to the mock-transfected condition (grey  
725 horizontal curve). Bar histograms on the right show the inhibition of impedance  
726 response relative to the untreated control sample, calculated from the maximum CI  
727 values obtained for each treated sample.

728 **FIG 5** CEI measures the alteration in fusogenic potential of SARS-CoV-2 S variants.  
729 **(A)** Comparison of impedance signal of A549.ACE2<sup>+</sup> cells overlaid with HEK293T  
730 cells transfected with plasmid DNA coding for SARS-CoV-2 S either from Wuhan-Hu-  
731 1, carrying D614 (blue) or a mutant with G614 (red) as found in the Nextstrain clade  
732 20A and its descendants. In both conditions, 2.5  $\mu$ g S expressing plasmid DNA was  
733 added to 200  $\mu$ l transfection mixture for the transfection of 400,000 HEK293T donor  
734 cells. Graph on the left depicts the impedance signal of 2 technical replicates (mean  $\pm$   
735 SD), normalized to the mock-transfected condition (grey horizontal curve). Bar  
736 histograms on the right show the maximum CI values (mean  $\pm$  SD). **(B)** Same as in (A)  
737 but for the comparison between Wuhan-Hu-1 and Omicron. **(C)** Fusion-inhibitory effect  
738 of UDA (2  $\mu$ M) on different N-glycosylation deletion mutants. Mutants of Wuhan-Hu-1  
739 S that contained two deletions of adjacent N-glycosylation sites in the S2 subunit were  
740 generated (by N into Q conversion) and analyzed in a CEI-based cell-cell fusion assay

741 for their sensitivity to UDA. Graphs show the impedance signal of 2 technical replicates  
742 (mean  $\pm$  SD), normalized to the mock-transfected condition.

## Figures

Figure 1

**A**

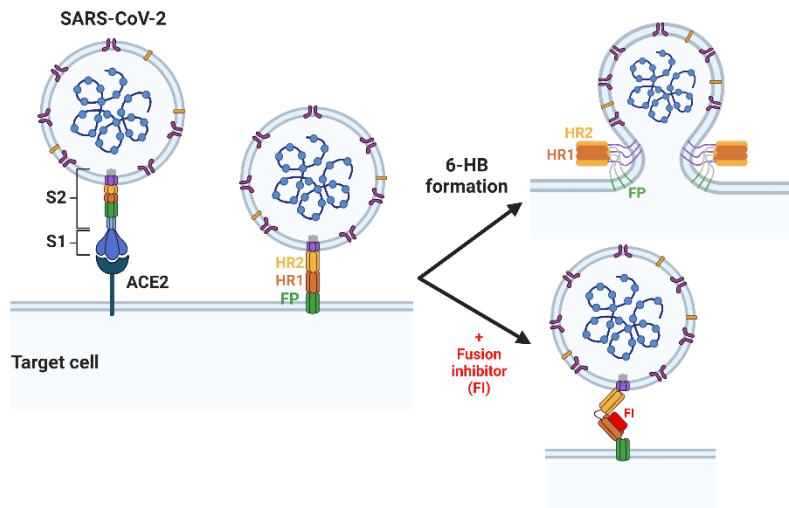

**B**

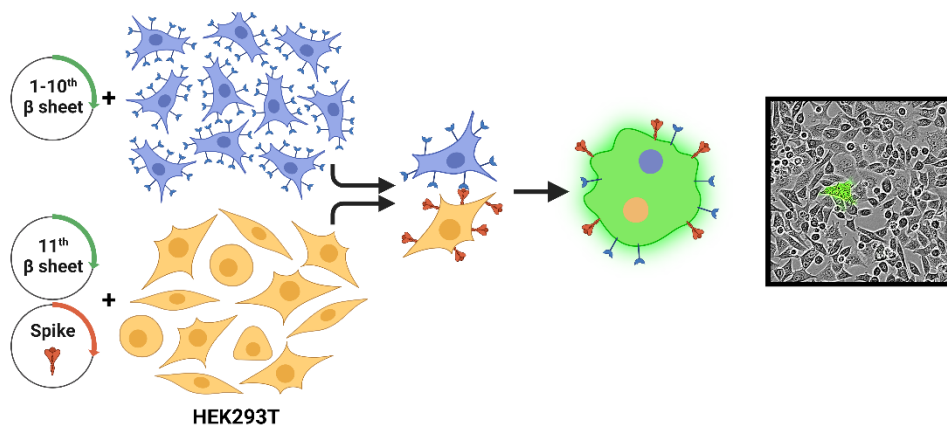

**C**

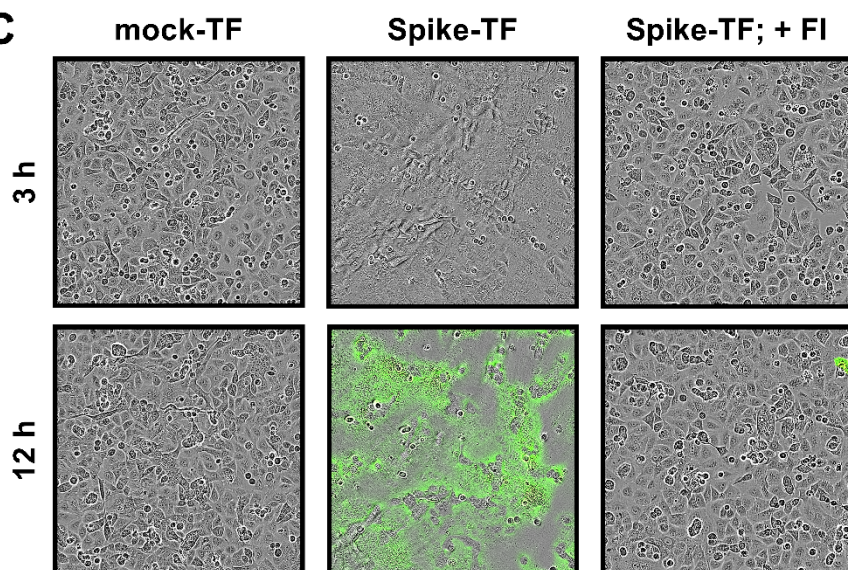



Figure 2

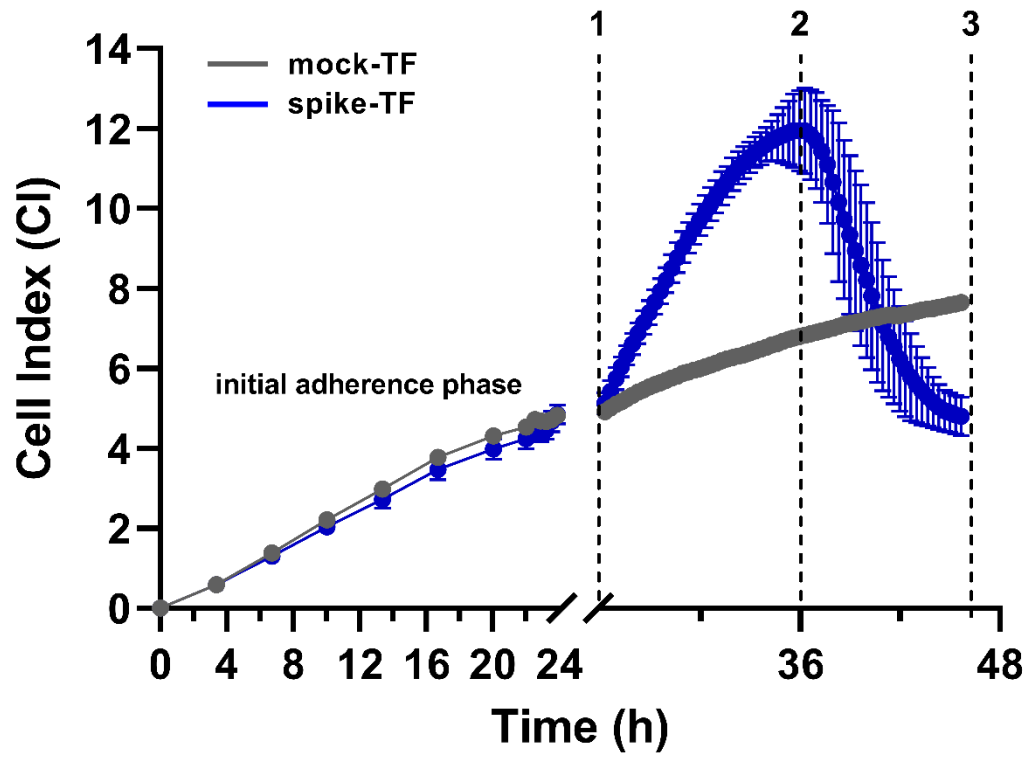

Figure 3

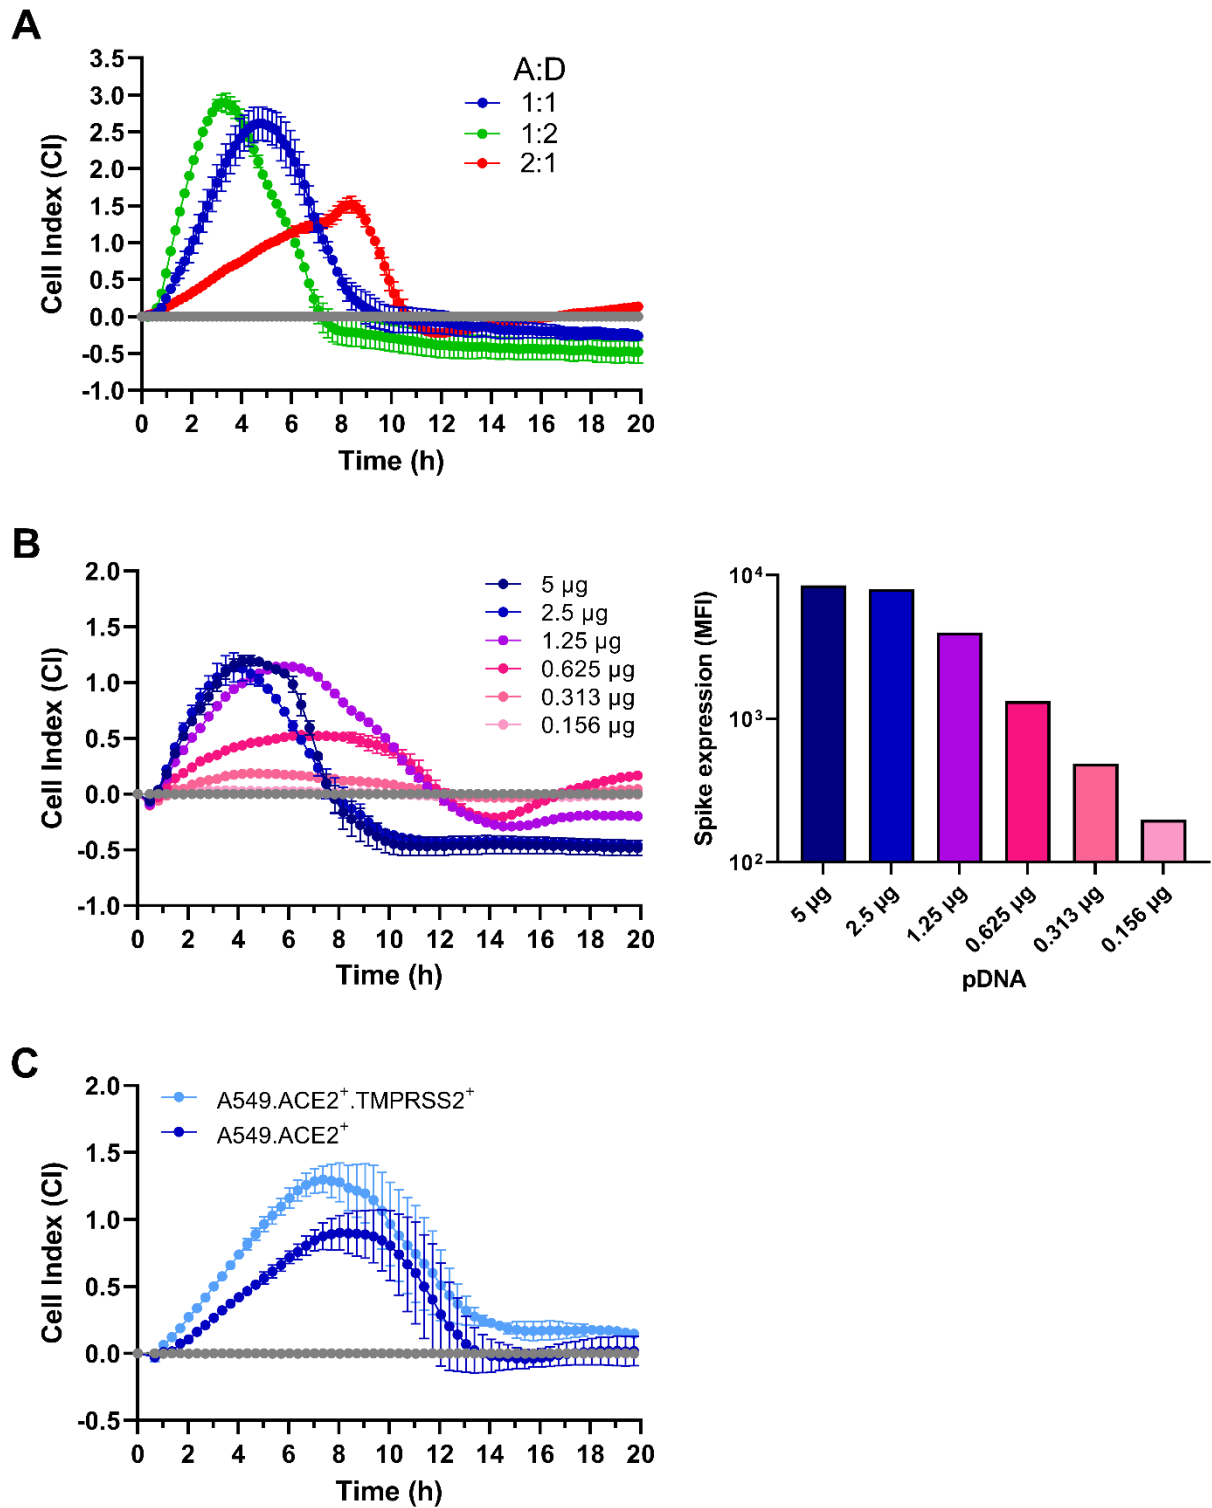

Figure 4

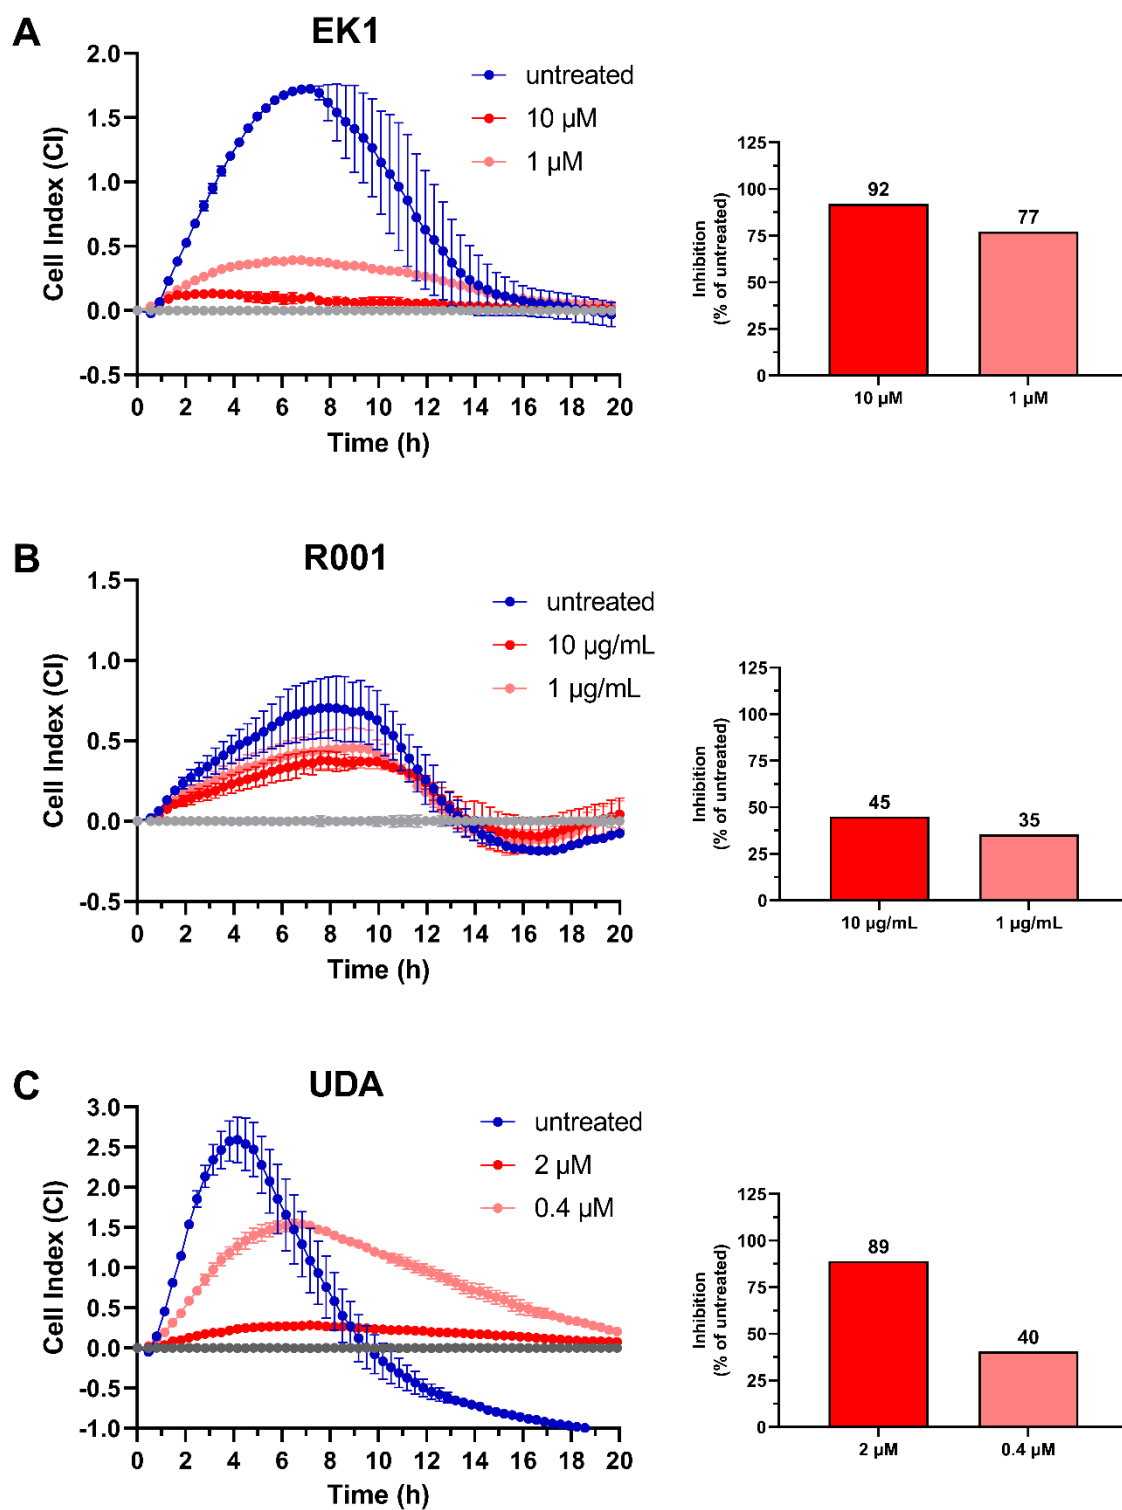

Figure 5

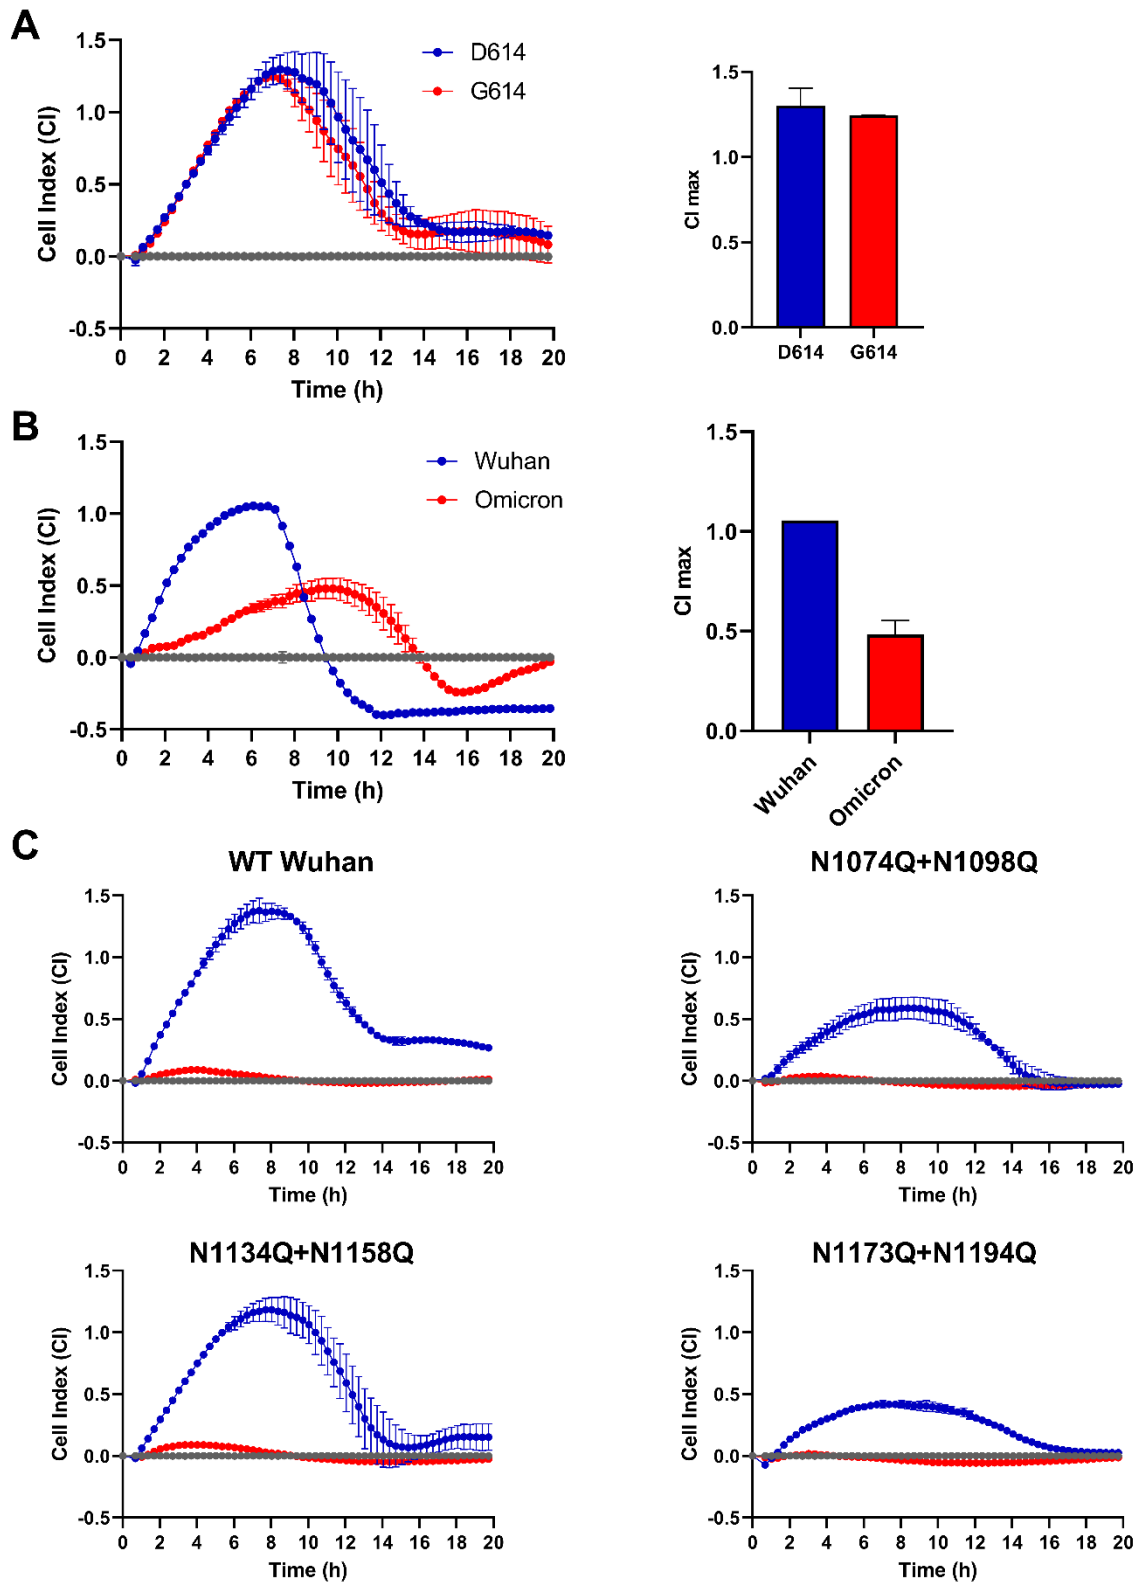

## SUPPLEMENTAL MATERIAL

### Supplementary Figures

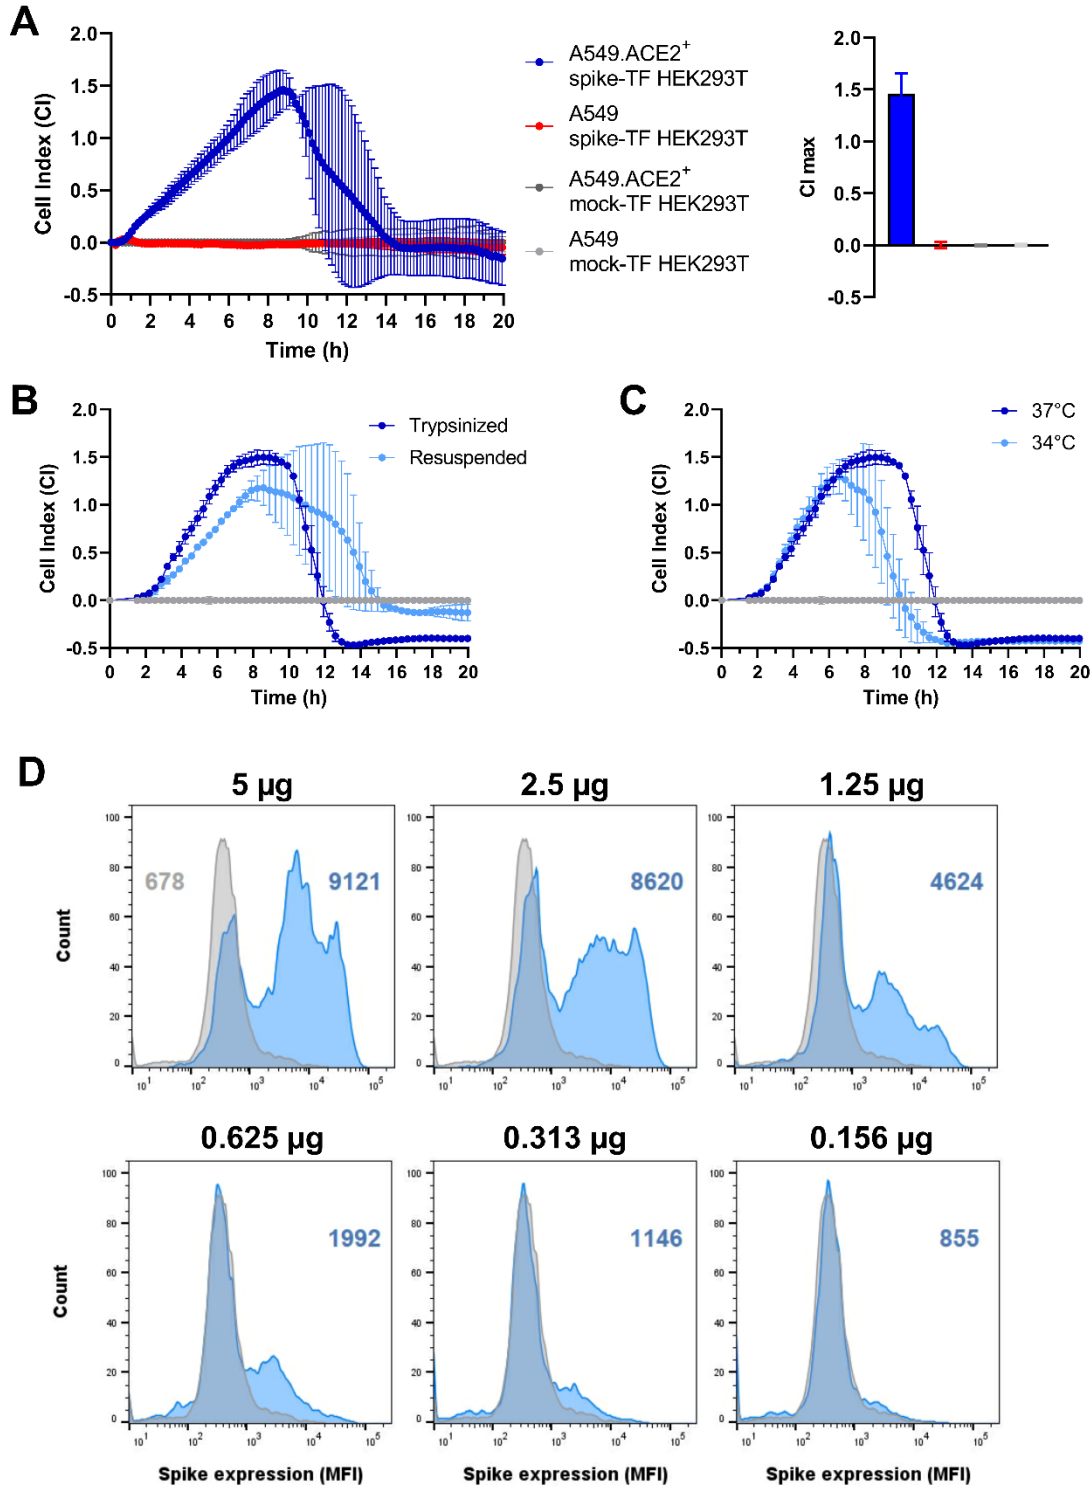

**Suppl FIG 1** Optimization of CEI-measured S-induced cell-cell fusion. **(A)** Cell-cell fusion depends both on the expression of ACE2 on A549 cells and SARS-CoV-2 S protein on transfected HEK293T cells. Different combinations of acceptor and donor cells were tested as indicated. The graph depicts the impedance signal of 4 technical replicates (mean  $\pm$  SD). Bar histograms at the right represent the cell index value at 8:43h post overlay, when the maximum was reached in the positive control. Note that no increase in impedance signal (CI max  $\sim$  0) was obtained in the conditions in which ACE2 and/or spike were not (over)-expressed. **(B)** Comparison of impedance signal of A549.ACE2<sup>+</sup> cells overlayed with SARS-CoV-2 Wuhan Hu-1 S-transfected HEK293T cells, either trypsinized or collected by resuspending. The graph depicts the impedance signal of 2 technical replicates (mean  $\pm$  SD). **(C)** HEK293T cells were transfected with SARS-CoV-2 Wuhan Hu-1 S. After 6h, transfection reagent was removed and cells were incubated either at 34°C or 37°C for 18h. S-expressing cells were then trypsinized, collected and administered to a A549.ACE2<sup>+</sup> cell monolayer, and further incubated at 37°C for the CEI measurement. The graph depicts the impedance signal of 2 technical replicates (mean  $\pm$  SD). **(D)** Flow cytometric histogram plots of the samples presented in Fig 3B (see figure legend to Fig 3B for experimental details). HEK293T cells were collected 24h post transfection, stained with anti-S Ab (R001) and an AF647-labeled secondary Ab. Of each sample 10,000 cells were analyzed on a FACSCelesta to calculate the mean fluorescence intensity (MFI) value. The grey histogram represents the stained mock-transfected background control sample, whereas the S-transfected cells are indicated in blue. The values in color refer to the respective MFI value.

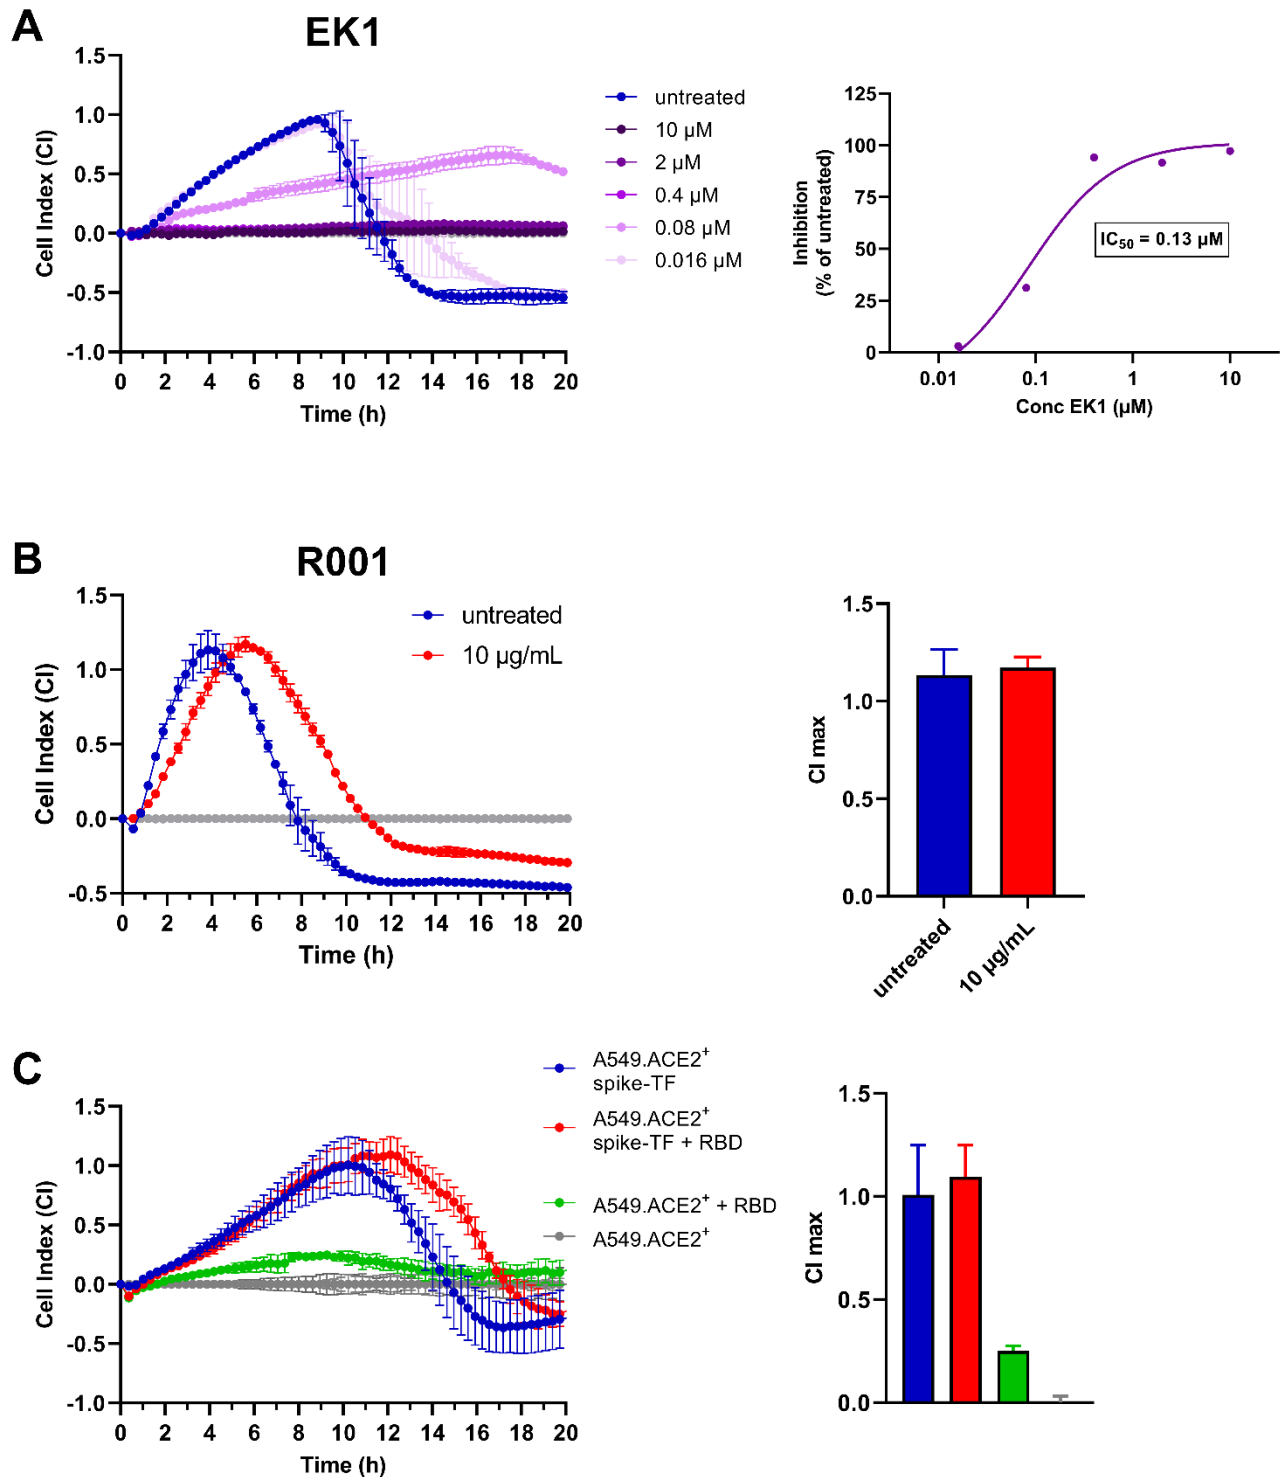

**Suppl FIG 2** Validation of CEI cell-cell fusion assay with entry inhibitors of SARS-CoV-2. (A) Fusion inhibitor EK1 inhibits concentration-dependently the cell-cell fusion of S-transfected (Wuhan-Hu-1 strain) HEK293T donor with A549.ACE2<sup>+</sup> acceptor cells. Inhibitor and donor cells were added simultaneously to the A549.ACE2<sup>+</sup> acceptor cells.

The graph on the left shows the impedance signal of 2 technical replicates (mean  $\pm$  SD), normalized to the mock-transfected condition. Concentration-response curve on the right shows the inhibition of impedance response relative to the untreated control sample, calculated from the CI values obtained at the time point when maximum CI was reached in the positive control. The calculated 50% inhibitory concentration ( $IC_{50}$ ) is given in the boxed insert. **(B)** The S-binding attachment inhibitor Ab R001 delays the cell-cell fusion of S-transfected (Wuhan-Hu-1 strain) HEK293T donor with A549.ACE2<sup>+</sup> acceptor cells transiently transfected with TMPRSS2. R001 (10  $\mu$ g/ml) and donor cells were added simultaneously to the A549.ACE2<sup>+</sup>.TMPRSS2<sup>+</sup> acceptor cells. The graph shows the impedance signal of 2 technical replicates (mean  $\pm$  SD), normalized to the mock-transfected condition. Bar histograms on the right show the maximum CI values (mean  $\pm$  SD; n=2). **(C)** RBD peptide from SARS-CoV-2 Wuhan-Hu-1 S delays the cell-cell fusion of S-transfected (Wuhan-Hu-1) HEK293T donor with A549.ACE2<sup>+</sup> acceptor cells. RBD (81 nM) and donor cells were added simultaneously to the A549.ACE2<sup>+</sup> acceptor cells (red curve). In parallel, RBD (81 nM) was administered to a monolayer of A549.ACE2<sup>+</sup> cells in the absence of spike-expressing cells to measure the (small) morphological changes induced by RBD binding to the ACE2 receptor (green curve). The graph shows the impedance signal of 4 technical replicates (mean  $\pm$  SD), normalized to the respective mock-transfected or untreated condition. Bar histograms on the right show the maximum CI values (mean  $\pm$  SD; n=4).



**A** UDA pretreatment A549.ACE2<sup>+</sup>

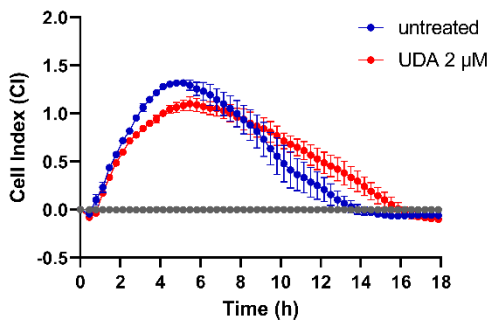

**B** UDA pretreatment HEK293T spike-TF

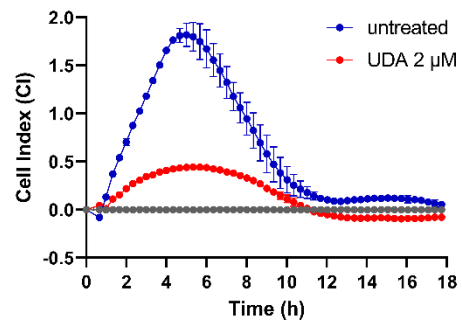

**Suppl FIG 3** Plant lectin UDA inhibits CEI quantified cell-cell fusion through binding to SARS-CoV-2 S. **(A)** A monolayer of A549.ACE2<sup>+</sup> cells were pretreated with UDA (2μM) for 1h at 37°C, washed and overlaid with S-transfected (Wuhan-Hu-1) HEK293T cells without additional compound administration. **(B)** At 24h post transfection, S-transfected (Wuhan-Hu-1) HEK293T cells were first pretreated with UDA (2μM) for 1h at 4°C, trypsinized, collected and washed. Cells were resuspended in culture medium and overlaid on a monolayer of A549.ACE2<sup>+</sup> cells without additional compound administration. Graph show the impedance signal of 2 technical replicates (mean ± SD), normalized to the mock-transfected condition.

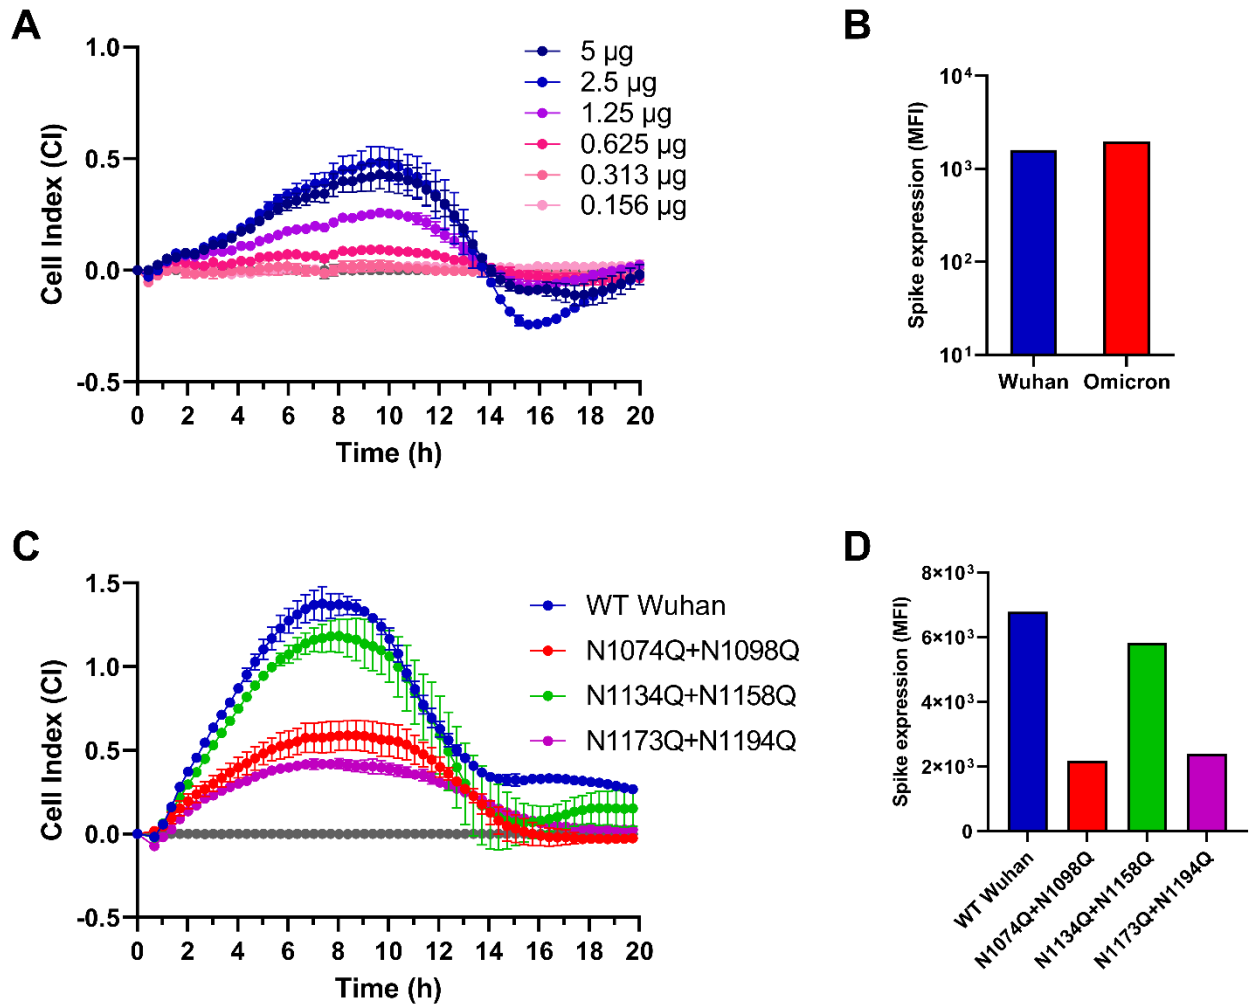

**Suppl FIG 4** CEI measures the alteration in fusogenic potential of SARS-CoV-2 S variants. **(A)** Same as in Fig 3B but with transfection of Omicron S (BA.1 variant). **(B)** Transfected HEK293T samples (each with 2.5  $\mu\text{g}$  plasmid DNA) from Fig 5B were collected 24h post transfection, stained with anti-S Ab (R001) and an AF647-labeled secondary Ab. Bar histograms represent the background-corrected mean fluorescence intensity (MFI) values (on a logarithmic scale), calculated from 10,000 cells analyzed by a FACSCelesta flow cytometer. **(C)** Untreated control samples from Fig 5C were plotted together in one graph to compare the fusion efficiency of N-glycosylation mutants of S. **(D)** Transfected HEK293T samples from (C) were collected 24h post transfection, stained with anti-S Ab (MM57) and an PE-labeled secondary Ab. Bar

histograms represent the background-corrected MFI values (on a logarithmic scale), calculated from 10,000 cells analyzed by a FACSCelesta flow cytometer.

## Supplementary movies

**Supplementary movie 1.** A549.ACE2<sup>+</sup> cells (transfected to express the first 10 betasheets of neongreen) were overlaid with HEK293T cells co-transfected with a plasmid encoding the SARS-CoV-2 spike protein and a plasmid encoding the 11<sup>th</sup> betasheet of neongreen. Overlay was done with mock-transfected (empty vector; left) or spike-transfected (middle and right) HEK293T cells, either in the absence (middle) or presence (right) of the fusion inhibitor (FI) EK1 (2  $\mu$ M). Fusion events were visualized using the IncuCyte® S3 Live-Cell Analysis System (Sartorius). Phase contrast and GFP images were taken using a 20x objective lens at 30 minute intervals for a 24 hours period. Image processing was performed using the IncuCyte software.

**Supplementary movie 2.** A549.ACE2<sup>+</sup> cells were overlaid with HEK293T cells transfected with a plasmid encoding the Wuhan-Hu-1 SARS-CoV-2 spike protein. Overlay was done with mock-transfected (empty vector; red) or spike-transfected (blue) HEK293T cells. Left panels: fusion events were visualized using the IncuCyte® S3 Live-Cell Analysis System (Sartorius). Phase contrast images were taken using a 20x objective lens at 30 minute intervals for a 19 hours period. Image processing was performed using the IncuCyte software. In parallel (right graph), the same cell-cell fusion was performed in impedance E-plates and the CEI was recorded in real-time, starting from the time point of cell overlay. The graph depicts the impedance signal (expressed as cell index) over time of 4 technical replicates (mean  $\pm$  SD).
